# Supplementary material
Source: PubMed Central journal article supplement (PMC7703498)
Supplement: NIHMS1633313-supplement-Supplemental_Publication_Material.pdf [file NIHMS1633313-supplement-Supplemental_Publication_Material.pdf]

# **Supplemental Material**

## Contents

|                                                                                                                                                                                                       |    |
|-------------------------------------------------------------------------------------------------------------------------------------------------------------------------------------------------------|----|
| 1. Supplemental Tables.....                                                                                                                                                                           | 3  |
| <b>Supplemental Table I.</b> Baseline Patient Characteristics According to Prior Heart Failure or Low Systolic Left Ventricular Function .....                                                        | 3  |
| <b>Supplemental Table II.</b> Baseline Patient Characteristics According to Prior HF or LVEF < 50%.....                                                                                               | 5  |
| <b>Supplemental Table III:</b> Association between heart failure subtype at baseline (HFpEF and HFmEF) and outcomes .....                                                                             | 9  |
| <b>Supplemental Table IV.</b> Association between heart failure subtype at baseline and outcomes .....                                                                                                | 11 |
| <b>Supplemental Table V.</b> Association between baseline continuous LVEF and trial endpoints .....                                                                                                   | 13 |
| <b>Supplemental Table VI.</b> Cumulative incidence and 95%CI for the primary outcomes according to randomized treatment and history of HF/LVD over time.....                                          | 14 |
| 2. Supplemental Figures.....                                                                                                                                                                          | 15 |
| <b>Supplemental Figure I.</b> Association between randomized treatment and endpoints for patients with and without HF/LVD at baseline using LVEF<50% to define LVD .....                              | 15 |
| <b>Supplemental Figure II.</b> Cumulative incidence curves for the primary endpoint according to randomized treatment and history of HF/LVD using LVEF<50% to define LVD .....                        | 16 |
| <b>Supplemental Figure III.</b> Association between randomized treatment and outcomes for patients with and without HF/LVD at baseline based on adjusted proportional hazards regression models ..... | 17 |
| 3. Supplemental Statistical Methods .....                                                                                                                                                             | 18 |
| <b>Imputation of LVEF values</b> .....                                                                                                                                                                | 18 |
| <b>Calculating 95% confidence intervals for the differences in the CIF estimates</b> .....                                                                                                            | 18 |
| <b>Calculation of interaction p-values for the test of differences in CIF differences</b> .....                                                                                                       | 18 |

## 1. Supplemental Tables

**Supplemental Table I.** Baseline Patient Characteristics According to Prior Heart Failure or Low Systolic Left Ventricular Function

|                                | No History of HF/LVD<br>(N=4,776) | History of HF/LVD |                 |                | p*    |
|--------------------------------|-----------------------------------|-------------------|-----------------|----------------|-------|
|                                |                                   | Overall (N=398)   | HFrEF (n=221)   | HFpEF (n=177)  |       |
| CCS Angina Class               |                                   |                   |                 |                | 0.258 |
| None                           | 945/4775 (19.8%)                  | 88/397 (22.2%)    | 51/221 (23.1%)  | 37/176 (21.0%) |       |
| I                              | 1295/4775 (27.1%)                 | 91/397 (22.9%)    | 57/221 (25.8%)  | 34/176 (19.3%) |       |
| II                             | 2327/4775 (48.7%)                 | 195/397 (49.1%)   | 105/221 (47.5%) | 90/176 (51.1%) |       |
| III                            | 207/4775 (4.3%)                   | 23/397 (5.8%)     | 8/221 (3.6%)    | 15/176 (8.5%)  |       |
| IV                             | 1/4775 (<0.1%)                    | 0                 |                 |                |       |
| Current smoker                 | 581/4772 (12.2%)                  | 58/397 (14.6%)    | 31/221 (14.0%)  | 27/176 (15.3%) | 0.157 |
| LVEF, %                        |                                   |                   |                 |                | <.001 |
| n                              | 4252                              | 381               | 214             | 167            |       |
| Median (Q1, Q3)                | 60 (56, 65)                       | 44 (40, 58)       | 41 (39, 43)     | 60 (54, 64)    |       |
| BMI, kg/m <sup>2</sup>         |                                   |                   |                 |                | <.001 |
| n                              | 4725                              | 394               | 219             | 175            |       |
| Median (Q1, Q3)                | 28 (25, 31)                       | 29 (26, 33)       | 29 (25, 33)     | 30 (26, 34)    |       |
| Systolic blood pressure, mmHg  |                                   |                   |                 |                | 0.118 |
| n                              | 4748                              | 397               | 221             | 176            |       |
| Median (Q1, Q3)                | 130 (120, 142)                    | 130 (120, 140)    | 131 (120, 143)  | 130 (120, 140) |       |
| Diastolic blood pressure, mmHg |                                   |                   |                 |                | 0.846 |
| n                              | 4748                              | 397               | 221             | 176            |       |
| Median (Q1, Q3)                | 77 (70, 81)                       | 78 (70, 82)       | 77 (70, 84)     | 78 (70, 80)    |       |
| Heart rate, bpm                |                                   |                   |                 |                | 0.143 |
| n                              | 4744                              | 397               | 221             | 176            |       |
| Median (Q1, Q3)                | 67 (60, 75)                       | 68 (61, 75)       | 68 (62, 77)     | 66 (60, 72)    |       |
| Atrial fibrillation            | 169/4773 (3.5%)                   | 52/395 (13.2%)    | 21/220 (9.5%)   | 31/175 (17.7%) | <.001 |
| AF Type                        |                                   |                   |                 |                | 0.056 |
| Paroxysmal                     | 105/154 (68.2%)                   | 25/49 (51.0%)     | 10/18 (55.6%)   | 15/31 (48.4%)  |       |
| Persistent                     | 17/154 (11.0%)                    | 11/49 (22.4%)     | 5/18 (27.8%)    | 6/31 (19.4%)   |       |
| Chronic/Permanent              | 32/154 (20.8%)                    | 13/49 (26.5%)     | 3/18 (16.7%)    | 10/31 (32.3%)  |       |
| QOL                            |                                   |                   |                 |                |       |
| SAQ Angina Frequency Score     |                                   |                   |                 |                | 0.902 |
| n                              | 4262                              | 380               | 204             | 176            |       |
| Median (Q1, Q3)                | 90 (70, 100)                      | 90 (70, 100)      | 90 (70, 100)    | 85 (65, 100)   |       |
| SAQ Physical Limitation Score  |                                   |                   |                 |                | <.001 |
| n                              | 3959                              | 342               | 183             | 159            |       |
| Median (Q1, Q3)                | 83 (67, 100)                      | 75 (50, 100)      | 83 (58, 100)    | 67 (50, 92)    |       |
| SAQ Quality of Life Score      |                                   |                   |                 |                | 0.010 |
| n                              | 4255                              | 381               | 205             | 176            |       |
| Median (Q1, Q3)                | 63 (50, 88)                       | 63 (38, 88)       | 63 (38, 88)     | 50 (38, 88)    |       |
| SAQ Summary Score              |                                   |                   |                 |                | <.001 |

|                          | No History of HF/LVD<br>(N=4,776) | History of HF/LVD |                   |                   | p*    |
|--------------------------|-----------------------------------|-------------------|-------------------|-------------------|-------|
|                          |                                   | Overall (N=398)   | HFrEF (n=221)     | HFpEF (n=177)     |       |
| n                        | 4264                              | 381               | 205               | 176               |       |
| Median (Q1, Q3)          | 77 (63, 89)                       | 73 (57, 88)       | 74 (59, 89)       | 69 (51, 88)       |       |
| Rose Dyspnea Scale       |                                   |                   |                   |                   | <.001 |
| 0                        | 1701/4508 (37.7%)                 | 109/387 (28.2%)   | 71/215 (33.0%)    | 38/172 (22.1%)    |       |
| 1                        | 1607/4508 (35.6%)                 | 130/387 (33.6%)   | 72/215 (33.5%)    | 58/172 (33.7%)    |       |
| 2                        | 684/4508 (15.2%)                  | 72/387 (18.6%)    | 34/215 (15.8%)    | 38/172 (22.1%)    |       |
| 3                        | 304/4508 (6.7%)                   | 42/387 (10.9%)    | 25/215 (11.6%)    | 17/172 (9.9%)     |       |
| 4                        | 212/4508 (4.7%)                   | 34/387 (8.8%)     | 13/215 (6.0%)     | 21/172 (12.2%)    |       |
| <b>Biochemistry</b>      |                                   |                   |                   |                   |       |
| Estimated GFR, mL/min    |                                   |                   |                   |                   | <.001 |
| n                        | 4145                              | 328               | 191               | 137               |       |
| Median (Q1, Q3)          | 82 (69, 97)                       | 72 (60, 87)       | 76 (63, 91)       | 66 (57, 82)       |       |
| Creatinine, mg/dL        |                                   |                   |                   |                   | <.001 |
| n                        | 4145                              | 328               | 191               | 137               |       |
| Median (Q1, Q3)          | 0.94 (0.80, 1.10)                 | 1.06 (0.91, 1.24) | 1.04 (0.90, 1.20) | 1.09 (0.92, 1.30) |       |
| Glucose, mg/dL           |                                   |                   |                   |                   | 0.385 |
| n                        | 4226                              | 362               | 199               | 163               |       |
| Median (Q1, Q3)          | 106 (94, 133)                     | 108 (95, 131)     | 108 (94, 130)     | 107 (96, 134)     |       |
| HbA1c, %                 |                                   |                   |                   |                   | 0.042 |
| n                        | 3187                              | 250               | 153               | 97                |       |
| Median (Q1, Q3)          | 6.3 (5.7, 7.4)                    | 6.5 (5.8, 7.5)    | 6.3 (5.8, 7.3)    | 6.8 (6.0, 7.7)    |       |
| Sodium, mmol/L           |                                   |                   |                   |                   | 0.343 |
| n                        | 4338                              | 359               | 194               | 165               |       |
| Median (Q1, Q3)          | 140 (138, 142)                    | 140 (138, 142)    | 139 (137, 141)    | 140 (139, 142)    |       |
| Potassium, mmol/L        |                                   |                   |                   |                   | 0.002 |
| n                        | 4366                              | 364               | 197               | 167               |       |
| Median (Q1, Q3)          | 4.4 (4.1, 4.7)                    | 4.4 (4.2, 4.8)    | 4.4 (4.1, 4.8)    | 4.5 (4.3, 4.8)    |       |
| WBC, 10 <sup>9</sup> /L  |                                   |                   |                   |                   | 0.125 |
| n                        | 4455                              | 372               | 202               | 170               |       |
| Median (Q1, Q3)          | 7.2 (6.1, 8.5)                    | 7.4 (6.2, 8.9)    | 7.3 (6.1, 8.9)    | 7.4 (6.4, 8.7)    |       |
| LDL, mg/dL               |                                   |                   |                   |                   | 0.043 |
| n                        | 4561                              | 376               | 210               | 166               |       |
| Median (Q1, Q3)          | 83 (63, 110)                      | 88 (66, 116)      | 86 (63, 109)      | 89 (70, 126)      |       |
| Total cholesterol, mg/dL |                                   |                   |                   |                   | 0.134 |
| n                        | 4682                              | 388               | 214               | 174               |       |
| Median (Q1, Q3)          | 154 (129, 186)                    | 154 (133, 189)    | 154 (132, 184)    | 153 (135, 197)    |       |

CCS, Canadian Cardiovascular Society; CCTA, coronary computed tomography angiography; GFR, glomerular filtration rate; HbA1c, hemoglobin A1c; HF/LVD, Heart Failure/ Left ventricular dysfunction; HFrEF, Heart failure with reduced ejection fraction; HFpEF, heart failure with preserved ejection fraction; LDL, low-density lipoprotein; Q1, first quartile; Q3, third quartile; QOL, Quality of Life; SAQ, Seattle Angina Questionnaire; WBC, white blood count

\* P-values comparing **any history of HF/LVD** versus none (first 2 columns)

† Uninterpretable degree of ischemia set to missing for chi-square test; Zero vessels with 50% stenosis is combined with one vessel for chi-square test

**Supplemental Table II. Baseline Patient Characteristics According to Prior HF or LVEF < 50%**

|                                | <b>No history of HF<br/>(N=4,491)</b> | <b>History of HF<br/>(N=647)</b> | <b>HFmEF (n=490)</b> | <b>HFpEF (n=154)</b> | <b>p*</b> |
|--------------------------------|---------------------------------------|----------------------------------|----------------------|----------------------|-----------|
| <b>Demographics</b>            |                                       |                                  |                      |                      |           |
| Age, years                     |                                       |                                  |                      |                      | 0.003     |
| n                              | 4491                                  | 647                              | 490                  | 154                  |           |
| Median (Q1, Q3)                | 65 (58, 71)                           | 66 (59, 72)                      | 65 (58, 72)          | 67 (60, 73)          |           |
| Female sex                     | 1043/4491 (23.2%)                     | 120/647 (18.5%)                  | 70/490 (14.3%)       | 48/154 (31.2%)       | 0.008     |
| Race                           |                                       |                                  |                      |                      | <.001     |
| White                          | 2878/4445 (64.7%)                     | 496/643 (77.1%)                  | 351/487 (72.1%)      | 143/153 (93.5%)      |           |
| Asian                          | 1380/4445 (31.0%)                     | 100/643 (15.6%)                  | 95/487 (19.5%)       | 5/153 (3.3%)         |           |
| Black or African American      | 156/4445 (3.5%)                       | 43/643 (6.7%)                    | 37/487 (7.6%)        | 5/153 (3.3%)         |           |
| Other                          | 31/4445 (0.7%)                        | 4/643 (0.6%)                     | 4/487 (0.8%)         | 0                    |           |
| NYHA Class                     |                                       |                                  |                      |                      | <.001     |
| None                           | 2886/4491 (64.3%)                     | 255/647 (39.4%)                  | 240/490 (49.0%)      | 14/154 (9.1%)        |           |
| I                              | 852/4491 (19.0%)                      | 134/647 (20.7%)                  | 99/490 (20.2%)       | 34/154 (22.1%)       |           |
| II                             | 753/4491 (16.8%)                      | 258/647 (39.9%)                  | 151/490 (30.8%)      | 106/154 (68.8%)      |           |
| CCS Angina Class               |                                       |                                  |                      |                      | 0.070     |
| None                           | 871/4490 (19.4%)                      | 155/646 (24.0%)                  | 123/490 (25.1%)      | 31/153 (20.3%)       |           |
| I                              | 1221/4490 (27.2%)                     | 154/646 (23.8%)                  | 125/490 (25.5%)      | 28/153 (18.3%)       |           |
| II                             | 2198/4490 (49.0%)                     | 308/646 (47.7%)                  | 227/490 (46.3%)      | 81/153 (52.9%)       |           |
| III                            | 199/4490 (4.4%)                       | 29/646 (4.5%)                    | 15/490 (3.1%)        | 13/153 (8.5%)        |           |
| IV                             | 1/4490 (<0.1%)                        | 0                                |                      |                      |           |
| Current smoker                 | 534/4487 (11.9%)                      | 95/646 (14.7%)                   | 70/490 (14.3%)       | 24/153 (15.7%)       | 0.042     |
| LVEF, %                        |                                       |                                  |                      |                      | <.001     |
| n                              | 4003                                  | 630                              | 483                  | 147                  |           |
| Median (Q1, Q3)                | 60 (57, 65)                           | 46 (43, 49)                      | 45 (41, 47)          | 60 (56, 65)          |           |
| BMI, kg/m2                     |                                       |                                  |                      |                      | <.001     |
| n                              | 4445                                  | 639                              | 484                  | 152                  |           |
| Median (Q1, Q3)                | 28 (25, 31)                           | 29 (26, 33)                      | 29 (26, 33)          | 30 (26, 34)          |           |
| Systolic blood pressure, mmHg  |                                       |                                  |                      |                      | 0.317     |
| n                              | 4464                                  | 646                              | 490                  | 153                  |           |
| Median (Q1, Q3)                | 130 (120, 142)                        | 130 (120, 141)                   | 132 (120, 142)       | 130 (120, 140)       |           |
| Diastolic blood pressure, mmHg |                                       |                                  |                      |                      | 0.927     |
| n                              | 4464                                  | 646                              | 490                  | 153                  |           |
| Median (Q1, Q3)                | 77 (70, 81)                           | 78 (70, 82)                      | 78 (70, 82)          | 78 (70, 80)          |           |
| Heart rate, bpm                |                                       |                                  |                      |                      | 0.030     |
| n                              | 4460                                  | 646                              | 490                  | 153                  |           |
| Median (Q1, Q3)                | 67 (60, 75)                           | 68 (61, 75)                      | 68 (62, 76)          | 65 (60, 72)          |           |
| <b>Medical history</b>         |                                       |                                  |                      |                      |           |
| Angina                         | 4034/4491 (89.8%)                     | 572/647 (88.4%)                  | 422/490 (86.1%)      | 148/154 (96.1%)      | 0.269     |
| MI                             | 747/4477 (16.7%)                      | 230/644 (35.7%)                  | 172/488 (35.2%)      | 57/153 (37.3%)       | <.001     |

|                                   | No history of HF<br>(N=4,491) | History of HF<br>(N=647) | HFmEF (n=490)   | HFpEF (n=154)   | p*    |
|-----------------------------------|-------------------------------|--------------------------|-----------------|-----------------|-------|
| PCI                               | 834/4487 (18.6%)              | 201/647 (31.1%)          | 134/490 (27.3%) | 66/154 (42.9%)  | <.001 |
| CABG                              | 162/4491 (3.6%)               | 38/647 (5.9%)            | 23/490 (4.7%)   | 15/154 (9.7%)   | 0.005 |
| PVD                               | 167/4483 (3.7%)               | 36/644 (5.6%)            | 22/487 (4.5%)   | 14/154 (9.1%)   | 0.023 |
| Stroke                            | 112/4490 (2.5%)               | 34/647 (5.3%)            | 28/490 (5.7%)   | 6/154 (3.9%)    | <.001 |
| Hypertension                      | 3237/4477 (72.3%)             | 521/643 (81.0%)          | 383/486 (78.8%) | 135/154 (87.7%) | <.001 |
| Diabetes                          | 1839/4491 (40.9%)             | 305/647 (47.1%)          | 237/490 (48.4%) | 67/154 (43.5%)  | 0.003 |
| Chronic lung disease              | 242/4481 (5.4%)               | 53/644 (8.2%)            | 32/488 (6.6%)   | 21/154 (13.6%)  | 0.004 |
| Hospitalization for heart failure | 0                             | 56/647 (8.7%)            | 23/490 (4.7%)   | 33/154 (21.4%)  | <.001 |
| <b>OMT at Randomization</b>       |                               |                          |                 |                 |       |
| Aspirin                           | 4053/4487 (90.3%)             | 557/647 (86.1%)          | 423/490 (86.3%) | 132/154 (85.7%) | <.001 |
| Statin                            | 4251/4486 (94.8%)             | 617/647 (95.4%)          | 470/490 (95.9%) | 144/154 (93.5%) | 0.518 |
| High intensity statin             | 1664/4486 (37.1%)             | 230/647 (35.5%)          | 178/490 (36.3%) | 52/154 (33.8%)  | 0.447 |
| ACE/ARB                           | 2876/4487 (64.1%)             | 515/647 (79.6%)          | 376/490 (76.7%) | 136/154 (88.3%) | <.001 |
| Beta blockers                     | 3576/4487 (79.7%)             | 552/647 (85.3%)          | 409/490 (83.5%) | 140/154 (90.9%) | <.001 |
| Aldosterone antagonist            | 72/4487 (1.6%)                | 40/647 (6.2%)            | 29/490 (5.9%)   | 9/154 (5.8%)    | <.001 |
| Long-acting nitrate               | 1502/4487 (33.5%)             | 164/647 (25.3%)          | 125/490 (25.5%) | 38/154 (24.7%)  | <.001 |
| Diuretic                          | 861/4487 (19.2%)              | 208/647 (32.1%)          | 137/490 (28.0%) | 69/154 (44.8%)  | <.001 |
| Antiarrhythmics                   | 51/4457 (1.1%)                | 17/639 (2.7%)            | 9/484 (1.9%)    | 8/154 (5.2%)    | 0.002 |
| Anticoagulants                    | 139/4448 (3.1%)               | 64/643 (10.0%)           | 47/486 (9.7%)   | 16/154 (10.4%)  | <.001 |
| Dual antiplatelet                 | 1082/4487 (24.1%)             | 134/647 (20.7%)          | 106/490 (21.6%) | 28/154 (18.2%)  | 0.057 |
| <b>QOL</b>                        |                               |                          |                 |                 |       |
| SAQ Angina Frequency Score        |                               |                          |                 |                 | 0.036 |
| n                                 | 3998                          | 611                      | 455             | 153             |       |
| Median (Q1, Q3)                   | 80 (70, 100)                  | 90 (70, 100)             | 90 (70, 100)    | 80 (60, 100)    |       |
| SAQ Physical Limitation Score     |                               |                          |                 |                 | <.001 |
| n                                 | 3715                          | 553                      | 411             | 139             |       |
| Median (Q1, Q3)                   | 83 (67, 100)                  | 83 (58, 100)             | 83 (67, 100)    | 67 (42, 92)     |       |
| SAQ Quality of Life Score         |                               |                          |                 |                 | 0.146 |
| n                                 | 3992                          | 612                      | 456             | 153             |       |
| Median (Q1, Q3)                   | 63 (38, 88)                   | 63 (38, 88)              | 63 (38, 88)     | 50 (38, 75)     |       |
| SAQ Summary Score                 |                               |                          |                 |                 | 0.119 |
| n                                 | 4000                          | 612                      | 456             | 153             |       |
| Median (Q1, Q3)                   | 77 (63, 89)                   | 75 (59, 89)              | 76 (62, 90)     | 67 (49, 84)     |       |
| Rose Dyspnea Scale                |                               |                          |                 |                 | 0.002 |
| 0                                 | 1590/4234 (37.6%)             | 209/629 (33.2%)          | 177/475 (37.3%) | 32/151 (21.2%)  |       |
| 1                                 | 1518/4234 (35.9%)             | 208/629 (33.1%)          | 156/475 (32.8%) | 51/151 (33.8%)  |       |
| 2                                 | 642/4234 (15.2%)              | 109/629 (17.3%)          | 74/475 (15.6%)  | 34/151 (22.5%)  |       |
| 3                                 | 286/4234 (6.8%)               | 57/629 (9.1%)            | 43/475 (9.1%)   | 14/151 (9.3%)   |       |
| 4                                 | 198/4234 (4.7%)               | 46/629 (7.3%)            | 25/475 (5.3%)   | 20/151 (13.2%)  |       |
| <b>Biochemistry</b>               |                               |                          |                 |                 |       |

|                                        | No history of HF<br>(N=4,491) | History of HF<br>(N=647) | HFmEF (n=490)     | HFpEF (n=154)     | p*    |
|----------------------------------------|-------------------------------|--------------------------|-------------------|-------------------|-------|
| Estimated GFR, mL/min                  |                               |                          |                   |                   | <.001 |
| n                                      | 3908                          | 538                      | 418               | 118               |       |
| Median (Q1, Q3)                        | 82 (69, 97)                   | 75 (61, 91)              | 77 (63, 94)       | 67 (57, 82)       |       |
| Creatinine, mg/dL                      |                               |                          |                   |                   | <.001 |
| n                                      | 3908                          | 538                      | 418               | 118               |       |
| Median (Q1, Q3)                        | 0.94 (0.80, 1.10)             | 1.03 (0.90, 1.20)        | 1.02 (0.89, 1.20) | 1.07 (0.92, 1.30) |       |
| Glucose, mg/dL                         |                               |                          |                   |                   | 0.033 |
| n                                      | 3974                          | 584                      | 440               | 142               |       |
| Median (Q1, Q3)                        | 106 (94, 131)                 | 109 (95, 135)            | 109 (95, 136)     | 106 (97, 129)     |       |
| HbA1c, %                               |                               |                          |                   |                   | 0.019 |
| n                                      | 2980                          | 433                      | 349               | 81                |       |
| Median (Q1, Q3)                        | 6.3 (5.7, 7.4)                | 6.5 (5.8, 7.5)           | 6.4 (5.8, 7.4)    | 6.7 (6.0, 7.7)    |       |
| Sodium, mmol/L                         |                               |                          |                   |                   | 0.485 |
| n                                      | 4073                          | 590                      | 443               | 144               |       |
| Median (Q1, Q3)                        | 140 (138, 142)                | 140 (138, 142)           | 140 (138, 142)    | 140 (139, 142)    |       |
| Potassium, mmol/L                      |                               |                          |                   |                   | 0.015 |
| n                                      | 4102                          | 594                      | 446               | 145               |       |
| Median (Q1, Q3)                        | 4.4 (4.1, 4.7)                | 4.4 (4.1, 4.8)           | 4.4 (4.1, 4.8)    | 4.5 (4.3, 4.8)    |       |
| WBC, 10 <sup>9</sup> /L                |                               |                          |                   |                   | 0.006 |
| n                                      | 4193                          | 600                      | 448               | 150               |       |
| Median (Q1, Q3)                        | 7.2 (6.1, 8.5)                | 7.4 (6.2, 8.9)           | 7.3 (6.2, 8.9)    | 7.6 (6.5, 8.8)    |       |
| LDL, mg/dL                             |                               |                          |                   |                   | 0.198 |
| n                                      | 4288                          | 614                      | 466               | 146               |       |
| Median (Q1, Q3)                        | 83 (63, 110)                  | 85 (63, 114)             | 84 (62, 111)      | 89 (69, 128)      |       |
| Total cholesterol, mg/dL               |                               |                          |                   |                   | 0.182 |
| n                                      | 4404                          | 631                      | 477               | 151               |       |
| Median (Q1, Q3)                        | 155 (129, 186)                | 153 (131, 190)           | 154 (131, 187)    | 152 (132, 200)    |       |
| Stress imaging and ETT detail          |                               |                          |                   |                   |       |
| Degree of ischemia                     |                               |                          |                   |                   | 0.010 |
| None                                   | 213/4479 (4.8%)               | 37/647 (5.7%)            | 25/490 (5.1%)     | 12/154 (7.8%)     |       |
| Mild                                   | 300/4479 (6.7%)               | 49/647 (7.6%)            | 40/490 (8.2%)     | 8/154 (5.2%)      |       |
| Moderate                               | 1441/4479 (32.2%)             | 244/647 (37.7%)          | 173/490 (35.3%)   | 70/154 (45.5%)    |       |
| Severe                                 | 2466/4479 (55.1%)             | 314/647 (48.5%)          | 249/490 (50.8%)   | 64/154 (41.6%)    |       |
| Uninterpretable                        | 59/4479 (1.3%)                | 3/647 (0.5%)             | 3/490 (0.6%)      | 0                 |       |
| Anterior ischemia                      | 1100/3274 (33.6%)             | 183/584 (31.3%)          | 156/448 (34.8%)   | 27/133 (20.3%)    | 0.285 |
| Duke Prognostic Score                  |                               |                          |                   |                   | 0.015 |
| n                                      | 2642                          | 325                      | 250               | 74                |       |
| Median (Q1, Q3)                        | 5 (5, 6)                      | 5 (5, 6)                 | 6 (5, 6)          | 5 (5, 6)          |       |
| Number of 50% Diseased Vessels by CCTA |                               |                          |                   |                   | 0.248 |

|                                        | No history of HF<br>(N=4,491) | History of HF<br>(N=647) | HFmEF (n=490)   | HFpEF (n=154) | p*    |
|----------------------------------------|-------------------------------|--------------------------|-----------------|---------------|-------|
| 0                                      | 3/2641 (0.1%)                 | 1/325 (0.3%)             | 1/250 (0.4%)    | 0             |       |
| 1                                      | 630/2641 (23.9%)              | 64/325 (19.7%)           | 48/250 (19.2%)  | 16/74 (21.6%) |       |
| 2                                      | 828/2641 (31.4%)              | 103/325 (31.7%)          | 76/250 (30.4%)  | 26/74 (35.1%) |       |
| 3                                      | 1180/2641 (44.7%)             | 157/325 (48.3%)          | 125/250 (50.0%) | 32/74 (43.2%) |       |
| LM ≥ 50% Stenosis by CCTA              | 35/3388 (1.0%)                | 4/431 (0.9%)             | 3/338 (0.9%)    | 1/91 (1.1%)   | 1.000 |
| Proximal LAD ≥ 50% Stenosis by CCTA    | 1568/3295 (47.6%)             | 169/419 (40.3%)          | 133/328 (40.5%) | 36/89 (40.4%) | 0.005 |
| Number of 70% Diseased Vessels by CCTA |                               |                          |                 |               | 0.100 |
| 0                                      | 275/2250 (12.2%)              | 25/294 (8.5%)            | 20/226 (8.8%)   | 5/67 (7.5%)   |       |
| 1                                      | 909/2250 (40.4%)              | 110/294 (37.4%)          | 87/226 (38.5%)  | 23/67 (34.3%) |       |
| 2                                      | 632/2250 (28.1%)              | 97/294 (33.0%)           | 71/226 (31.4%)  | 25/67 (37.3%) |       |
| 3                                      | 434/2250 (19.3%)              | 62/294 (21.1%)           | 48/226 (21.2%)  | 14/67 (20.9%) |       |
| Proximal LAD ≥ 70% Stenosis by CCTA    | 733/3286 (22.3%)              | 68/419 (16.2%)           | 55/328 (16.8%)  | 13/89 (14.6%) | 0.004 |

\* P-values comparing **any history of HF** versus none (first 2 columns)

† Uninterpretable degree of ischemia set to missing for chi-square test; Zero vessels with 50% stenosis is combined with one vessel for chi-square test.



Supplemental Table III: Association between heart failure subtype at baseline (HFpEF and HFmEF) and outcomes

| Variable Label          | CIF estimate (95% CI) | N events | Unadjusted HR<br>(95% CI) | Unadjusted p | Adjusted HR<br>(95% CI) | Adjusted p |
|-------------------------|-----------------------|----------|---------------------------|--------------|-------------------------|------------|
| <b>Primary endpoint</b> |                       |          |                           | <0.001       |                         | <0.001     |
| No history of HF        | 13.37 (12.24, 14.55)  | 539      | 1.00                      | -            | 1.00                    | -          |
| HFpEF                   | 17.31 (10.53, 25.49)  | 22       | 1.29 (0.84, 1.97)         | 0.248        | 1.04 (0.67, 1.59)       | 0.873      |
| HFmEF                   | 23.20 (18.95, 27.71)  | 104      | 1.82 (1.48, 2.25)         | <0.001       | 1.62 (1.31, 2.00)       | <0.001     |
| <b>CV death/MI</b>      |                       |          |                           | <0.001       |                         | <0.001     |
| No history of HF        | 11.91 (10.83, 13.05)  | 476      | 1.00                      | -            | 1.00                    | -          |
| HFpEF                   | 14.22 (8.06, 22.08)   | 18       | 1.19 (0.74, 1.90)         | 0.478        | 0.95 (0.59, 1.53)       | 0.838      |
| HFmEF                   | 20.33 (16.32, 24.65)  | 91       | 1.77 (1.42, 2.22)         | <0.001       | 1.57 (1.25, 1.97)       | <0.001     |
| <b>All-cause Death</b>  |                       |          |                           | <0.001       |                         | <0.001     |
| No history of HF        | 5.76 (4.96, 6.65)     | 220      | 1.00                      | -            | 1.00                    | -          |
| HFpEF                   | 9.64 (4.83, 16.44)    | 12       | 1.69 (0.94, 3.02)         | 0.078        | 1.20 (0.67, 2.17)       | 0.540      |
| HFmEF                   | 11.83 (8.64, 15.56)   | 55       | 2.29 (1.71, 3.08)         | <0.001       | 1.95 (1.44, 2.63)       | <0.001     |
| <b>CV Death</b>         |                       |          |                           | <0.001       |                         | <0.001     |
| No history of HF        | 3.79 (3.16, 4.51)     | 145      | 1.00                      | -            | 1.00                    | -          |
| HFpEF                   | 5.67 (2.12, 11.82)    | 7        | 1.51 (0.71, 3.23)         | 0.286        | 1.04 (0.48, 2.23)       | 0.929      |
| HFmEF                   | 10.86 (7.84, 14.42)   | 49       | 3.06 (2.21, 4.24)         | <0.001       | 2.61 (1.88, 3.63)       | <0.001     |
| <b>Primary MI</b>       |                       |          |                           | 0.042        |                         | 0.216      |
| No history of HF        | 9.11 (8.18, 10.10)    | 370      | 1.00                      | -            | 1.00                    | -          |
| HFpEF                   | 8.93 (4.54, 15.15)    | 13       | 1.09 (0.63, 1.90)         | 0.757        | 0.93 (0.53, 1.62)       |            |
| HFmEF                   | 13.69 (10.31, 17.54)  | 57       | 1.43 (1.08, 1.89)         | 0.012        | 1.28 (0.96, 1.69)       |            |
| <b>Unstable Angina</b>  |                       |          |                           | 0.951        |                         | 0.924      |
| No history of HF        | 1.03 (0.74, 1.41)     | 42       | 1.00                      | -            | 1.00                    | -          |
| HFpEF                   | 0.66 (0.06, 3.33)     | 1        | 0.76 (0.10, 5.50)         |              | 0.74 (0.10, 5.39)       |            |
| HFmEF                   | 1.22 (0.44, 2.76)     | 5        | 1.07 (0.42, 2.71)         |              | 1.12 (0.44, 2.87)       |            |
| <b>Heart Failure</b>    |                       |          |                           | <0.001       |                         | <0.001     |
| No history of HF        | 1.14 (0.82, 1.56)     | 50       | 1.00                      | -            | 1.00                    | -          |
| HFpEF                   | 3.02 (0.96, 7.19)     | 4        | 2.40 (0.86, 6.64)         | 0.093        | 1.61 (0.57, 4.53)       | 0.369      |

| Variable Label                          | CIF estimate (95% CI) | N events | Unadjusted HR<br>(95% CI) | Unadjusted p | Adjusted HR<br>(95% CI) | Adjusted p |
|-----------------------------------------|-----------------------|----------|---------------------------|--------------|-------------------------|------------|
| HFmEF                                   | 4.48 (2.66, 7.02)     | 21       | 4.23 (2.54, 7.07)         | <0.001       | 3.50 (2.08, 5.90)       | <0.001     |
| <b>All-cause death or HF</b>            |                       |          |                           | <0.001       |                         | <0.001     |
| <b>No history of HF</b>                 | 6.53 (5.68, 7.45)     | 254      | 1.00                      | -            | 1.00                    | -          |
| HFpEF                                   | 12.01 (6.58, 19.18)   | 15       | 1.82 (1.08, 3.06)         | 0.024        | 1.29 (0.76, 2.18)       | 0.350      |
| HFmEF                                   | 14.63 (11.09, 18.64)  | 67       | 2.52 (1.93, 3.31)         | <0.001       | 2.14 (1.63, 2.81)       | <0.001     |
| <b>HF death</b>                         |                       |          |                           | <0.001       |                         | 0.004      |
| <b>No history of HF</b>                 | 0.16 (0.06, 0.38)     | 6        | 1.00                      | -            | 1.00                    | -          |
| HFpEF                                   | 0.65 (0.06, 3.31)     | 1        | 5.19 (0.62, 43.22)        | 0.127        | 3.82 (0.43, 33.87)      | 0.229      |
| HFmEF                                   | 1.02 (0.28, 2.81)     | 6        | 9.99 (3.20, 31.13)        | <0.001       | 7.24 (2.27, 23.09)      | <0.001     |
| <b>New NYHA class II or greater</b>     |                       |          |                           | 0.332        |                         | 0.438      |
| <b>No history of HF</b>                 | 27.70 (26.06, 29.35)  | 927      | 1.00                      |              | 1.00                    |            |
| HFpEF                                   | 34.29 (19.40, 49.74)  | 14       | 1.31 (0.77, 2.22)         |              | 1.29 (0.76, 2.20)       |            |
| HFmEF                                   | 30.95 (25.45, 36.60)  | 96       | 1.13 (0.92, 1.39)         |              | 1.10 (0.89, 1.36)       |            |
| <b>New Rose Dyspnea Scale 2 or more</b> |                       |          |                           | 0.056        |                         | 0.114      |
| <b>No history of HF</b>                 | 33.80 (31.88, 35.73)  | 965      | 1.00                      |              | 1.00                    |            |
| HFpEF                                   | 48.49 (35.05, 60.67)  | 36       | 1.50 (1.08, 2.09)         |              | 1.43 (1.02, 1.99)       |            |
| HFmEF                                   | 35.21 (29.61, 40.84)  | 110      | 1.04 (0.85, 1.26)         |              | 1.02 (0.83, 1.24)       |            |

**Supplemental Table IV.** Association between heart failure subtype at baseline and outcomes

|                       | CIF estimate (95% CI) | N events | Unadjusted        |                | Adjusted*         |                |
|-----------------------|-----------------------|----------|-------------------|----------------|-------------------|----------------|
|                       |                       |          | HR (95% CI)       | p <sup>†</sup> | HR (95% CI)       | p <sup>†</sup> |
| Primary endpoint      |                       |          |                   | <0.001         |                   | <0.001         |
| No history of HF      | 13.78 (12.67, 14.93)  | 592      | 1.00              | -              | 1.00              | -              |
| HFpEF                 | 18.34 (11.65, 26.24)  | 27       | 1.32 (0.89, 1.94) | 0.163          | 1.04 (0.70, 1.53) | 0.857          |
| HFrEF                 | 25.77 (19.13, 32.90)  | 51       | 1.96 (1.47, 2.61) | <0.001         | 1.78 (1.33, 2.37) | <0.001         |
| CV death/MI           |                       |          |                   | <0.001         |                   | 0.001          |
| No history of HF      | 12.26 (11.20, 13.37)  | 523      | 1.00              | -              | 1.00              | -              |
| HFpEF                 | 15.60 (9.24, 23.47)   | 22       | 1.20 (0.79, 1.85) | 0.395          | 0.94 (0.61, 1.45) | 0.782          |
| HFrEF                 | 22.76 (16.53, 29.60)  | 45       | 1.93 (1.43, 2.62) | <0.001         | 1.76 (1.30, 2.39) | <0.001         |
| All-cause Death       |                       |          |                   | <0.001         |                   | <0.001         |
| No history of HF      | 6.05 (5.25, 6.92)     | 249      | 1.00              | -              | 1.00              | -              |
| HFpEF                 | 8.22 (4.14, 14.09)    | 12       | 1.36 (0.76, 2.42) | 0.302          | 0.92 (0.51, 1.65) | 0.779          |
| HFrEF                 | 14.11 (9.00, 20.34)   | 28       | 2.50 (1.69, 3.69) | <0.001         | 2.25 (1.52, 3.34) | <0.001         |
| CV Death              |                       |          |                   | <0.001         |                   | <0.001         |
| No history of HF      | 4.15 (3.50, 4.88)     | 170      | 1.00              | -              | 1.00              | -              |
| HFpEF                 | 4.86 (1.83, 10.16)    | 7        | 1.17 (0.55, 2.50) | 0.680          | 0.76 (0.35, 1.64) | 0.487          |
| HFrEF                 | 12.96 (8.23, 18.81)   | 26       | 3.40 (2.25, 5.13) | <0.001         | 3.07 (2.02, 4.65) | <0.001         |
| Primary MI            |                       |          |                   | 0.087          |                   | 0.258          |
| No history of HF      | 9.26 (8.35, 10.23)    | 399      | 1.00              |                | 1.00              |                |
| HFpEF                 | 11.07 (5.95, 17.96)   | 17       | 1.21 (0.74, 1.96) |                | 1.01 (0.62, 1.65) |                |
| HFrEF                 | 14.81 (9.79, 20.80)   | 27       | 1.52 (1.03, 2.25) |                | 1.39 (0.94, 2.06) |                |
| Unstable Angina       |                       |          |                   | 0.908          |                   | 0.894          |
| No history of HF      | 1.05 (0.77, 1.42)     | 45       | 1.00              |                | 1.00              |                |
| HFpEF                 | 0.57 (0.05, 2.92)     | 1        | 0.64 (0.09, 4.65) |                | 0.62 (0.08, 4.53) |                |
| HFrEF                 | 0.94 (0.19, 3.11)     | 2        | 1.00 (0.24, 4.10) |                | 1.00 (0.24, 4.15) |                |
| Heart Failure         |                       |          |                   | <0.001         |                   | 0.001          |
| No history of HF      | 1.30 (0.96, 1.73)     | 59       | 1.00              | -              | 1.00              | -              |
| HFpEF                 | 4.81 (2.07, 9.30)     | 8        | 3.76 (1.79, 7.88) | <0.001         | 2.39 (1.12, 5.12) | 0.024          |
| HFrEF                 | 4.17 (1.78, 8.16)     | 9        | 3.49 (1.73, 7.04) | <0.001         | 3.11 (1.53, 6.34) | 0.002          |
| All-cause death or HF |                       |          |                   | <0.001         |                   | <0.001         |
| No history of HF      | 6.88 (6.04, 7.80)     | 287      | 1.00              | -              | 1.00              | -              |

|                                            | CIF estimate (95% CI) | N events | Unadjusted         |                | Adjusted*          |                |
|--------------------------------------------|-----------------------|----------|--------------------|----------------|--------------------|----------------|
|                                            |                       |          | HR (95% CI)        | p <sup>†</sup> | HR (95% CI)        | p <sup>†</sup> |
| HFpEF                                      | 12.50 (7.33, 19.11)   | 19       | 1.88 (1.18, 3.00)  | 0.008          | 1.28 (0.80, 2.05)  | 0.306          |
| HFrEF                                      | 16.77 (11.13, 23.40)  | 33       | 2.61 (1.82, 3.75)  | <0.001         | 2.33 (1.62, 3.35)  | <0.001         |
| HF death                                   |                       |          |                    | 0.009          |                    | 0.023          |
| No history of HF                           | 0.18 (0.07, 0.40)     | 9        | 1.00               | -              | 1.00               | -              |
| HFpEF                                      | 0.57 (0.05, 2.90)     | 1        | 3.18 (0.40, 25.15) | 0.273          | 1.94 (0.23, 16.15) | 0.541          |
| HFrEF                                      | 1.66 (0.31, 5.45)     | 3        | 7.53 (2.03, 27.89) | 0.003          | 6.58 (1.71, 25.39) | 0.006          |
| NYHA class 2 or higher‡                    |                       |          |                    | 0.096          |                    | 0.096          |
| No history of HF                           | 27.77 (26.18, 29.38)  | 984      | 1.00               |                | 1.00               |                |
| HFpEF                                      | 36.49 (23.08, 50.00)  | 19       | 1.43 (0.91, 2.25)  |                | 1.43 (0.90, 2.25)  |                |
| HFrEF                                      | 33.79 (25.03, 42.75)  | 43       | 1.27 (0.94, 1.73)  |                | 1.28 (0.94, 1.74)  |                |
| Rose Dyspnea Scale 2 or more <sup>††</sup> |                       |          |                    | 0.058          |                    | 0.158          |
| No history of HF                           | 33.77 (31.91, 35.64)  | 1026     | 1.00               |                | 1.00               |                |
| HFpEF                                      | 45.30 (33.50, 56.37)  | 40       | 1.39 (1.01, 1.91)  |                | 1.28 (0.93, 1.76)  |                |
| HFrEF                                      | 37.55 (28.80, 46.27)  | 51       | 1.21 (0.91, 1.60)  |                | 1.20 (0.90, 1.59)  |                |

\* Adjusted for age (restricted cubic spline), sex, eGFR (restricted cubic spline), and diabetes

† The overall p-value is testing whether any of the HF categories differ. When a significant difference is identified, separate p-values comparing HFpEF to no history of HF and HFrEF to no history of HF are given.

‡ NYHA Class II or greater endpoint is restricted to 4157 participants without NYHA Class II or greater at baseline.

†† Rose Dyspnea Scale 2 or more endpoint is restricted to 3565 participants without Rose Dyspnea Scale 2 or more at baseline.

**Supplemental Table V.** Association between baseline continuous LVEF and trial endpoints

| Endpoint                      | Unadjusted                                                |        | Adjusted*                                                 |        |
|-------------------------------|-----------------------------------------------------------|--------|-----------------------------------------------------------|--------|
|                               | HR (95% CI)<br>corresponding to a 10%<br>increase in LVEF | p      | HR (95% CI)<br>corresponding to a 10%<br>increase in LVEF | p      |
| Primary endpoint              | 0.80 (0.73, 0.88)                                         | <0.001 | 0.83 (0.75, 0.91)                                         | <0.001 |
| CV death/MI                   | 0.80 (0.72, 0.88)                                         | <0.001 | 0.82 (0.75, 0.91)                                         | <0.001 |
| All-cause Death               | 0.68 (0.59, 0.78)                                         | <0.001 | 0.71 (0.62, 0.81)                                         | <0.001 |
| CV Death                      | 0.61 (0.52, 0.72)                                         | <0.001 | 0.63 (0.54, 0.74)                                         | <0.001 |
| Primary MI                    | 0.86 (0.77, 0.97)                                         | 0.012  | 0.90 (0.80, 1.01)                                         | 0.063  |
| Unstable Angina               | 1.23 (0.87, 1.75)                                         | 0.239  | 1.20 (0.84, 1.71)                                         | 0.320  |
| Heart Failure                 | 0.55 (0.42, 0.72)                                         | <0.001 | 0.57 (0.44, 0.74)                                         | <0.001 |
| All-cause death or HF         | 0.66 (0.59, 0.75)                                         | <0.001 | 0.69 (0.61, 0.78)                                         | <0.001 |
| HF death                      | 0.38 (0.20, 0.72)                                         | 0.003  | 0.41 (0.22, 0.77)                                         | 0.006  |
| NYHA Class II or greater†     | 1.03 (0.96, 1.12)                                         | 0.389  | 1.01 (0.94, 1.10)                                         | 0.738  |
| Rose Dyspnea Scale 2 or more‡ | 0.97 (0.90, 1.04)                                         | 0.351  | 0.94 (0.88, 1.01)                                         | 0.110  |

\* Adjusted for age (restricted cubic spline), sex, eGFR (restricted cubic spline), and diabetes

† NYHA Class II or greater endpoint is restricted to 4157 participants without NYHA Class II or greater at baseline.

‡ Rose Dyspnea Scale 2 or more endpoint is restricted to 3565 participants without Rose Dyspnea Scale 2 or more at baseline.

**Supplemental Table VI.** Cumulative incidence and 95%CI for the primary outcomes according to randomized treatment and history of HF/LVD over time

*Cumulative incidence (95% CI) at 1, 2, 3, and 4 years*

| <b>Randomized treatment and history of HF/LVD</b> | <b>1 year</b>      | <b>2 years</b>       | <b>3 years</b>       | <b>4 years</b>       |
|---------------------------------------------------|--------------------|----------------------|----------------------|----------------------|
| <b>CON, no HF/LVD</b>                             | 5.3% (4.4%, 6.2%)  | 9.1% (8.0%, 10.4%)   | 12.0% (10.7%, 13.4%) | 14.6% (13.0%, 16.2%) |
| <b>CON, HF/LVD</b>                                | 7.7% (4.4%, 12.1%) | 14.8% (10.0%, 20.5%) | 21.6% (15.4%, 28.7%) | 29.4% (21.2%, 38.0%) |
| <b>INV, no HF/LVD</b>                             | 7.1% (6.1%, 8.2%)  | 8.9% (7.8%, 10.1%)   | 11.1% (9.8%, 12.5%)  | 13.0% (11.5%, 14.6%) |
| <b>INV, HF/LVD</b>                                | 5.6% (3.1%, 9.3%)  | 10.5% (6.7%, 15.3%)  | 14.0% (9.4%, 19.6%)  | 17.2% (11.6%, 23.8%) |

## 2. Supplemental Figures

Supplemental Figure I. Association between randomized treatment and endpoints for patients with and without HF/LVD at baseline using LVEF<50% to define LVD

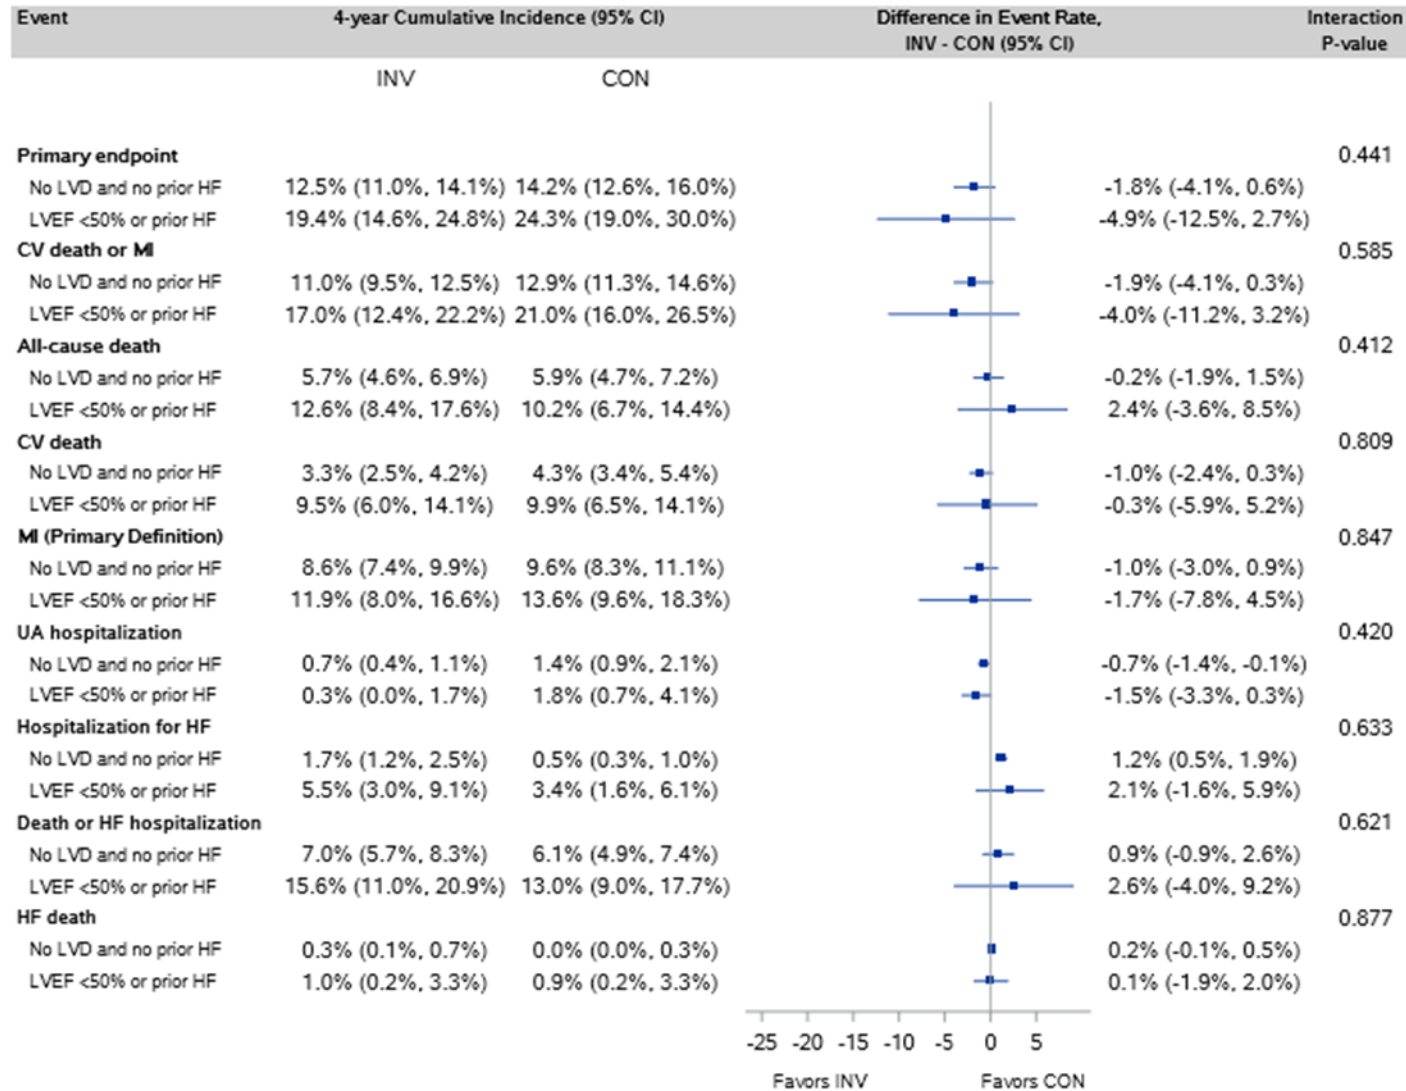

**Supplemental Figure II.** Cumulative incidence curves for the primary endpoint according to randomized treatment and history of HF/LVD using LVEF<50% to define LVD

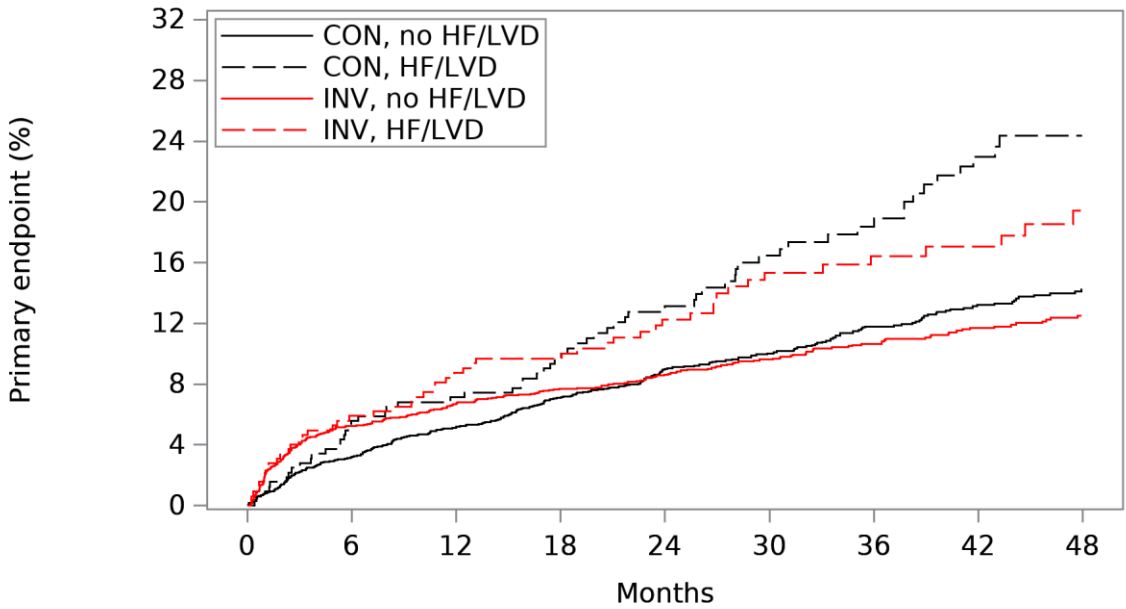

|                | Subjects at Risk |      |      |      |      |      |      |     |     |
|----------------|------------------|------|------|------|------|------|------|-----|-----|
|                | 0                | 6    | 12   | 18   | 24   | 30   | 36   | 42  | 48  |
| CON, no HF/LVD | 2244             | 2158 | 2112 | 1974 | 1657 | 1362 | 1128 | 872 | 631 |
| CON, HF/LVD    | 324              | 306  | 299  | 276  | 232  | 189  | 156  | 119 | 94  |
| INV, no HF/LVD | 2247             | 2105 | 2060 | 1944 | 1678 | 1389 | 1135 | 877 | 647 |
| INV, HF/LVD    | 323              | 301  | 288  | 268  | 217  | 179  | 150  | 117 | 84  |



**Supplemental Figure III.** Association between randomized treatment and outcomes for patients with and without HF/LVD at baseline based on adjusted proportional hazards regression models

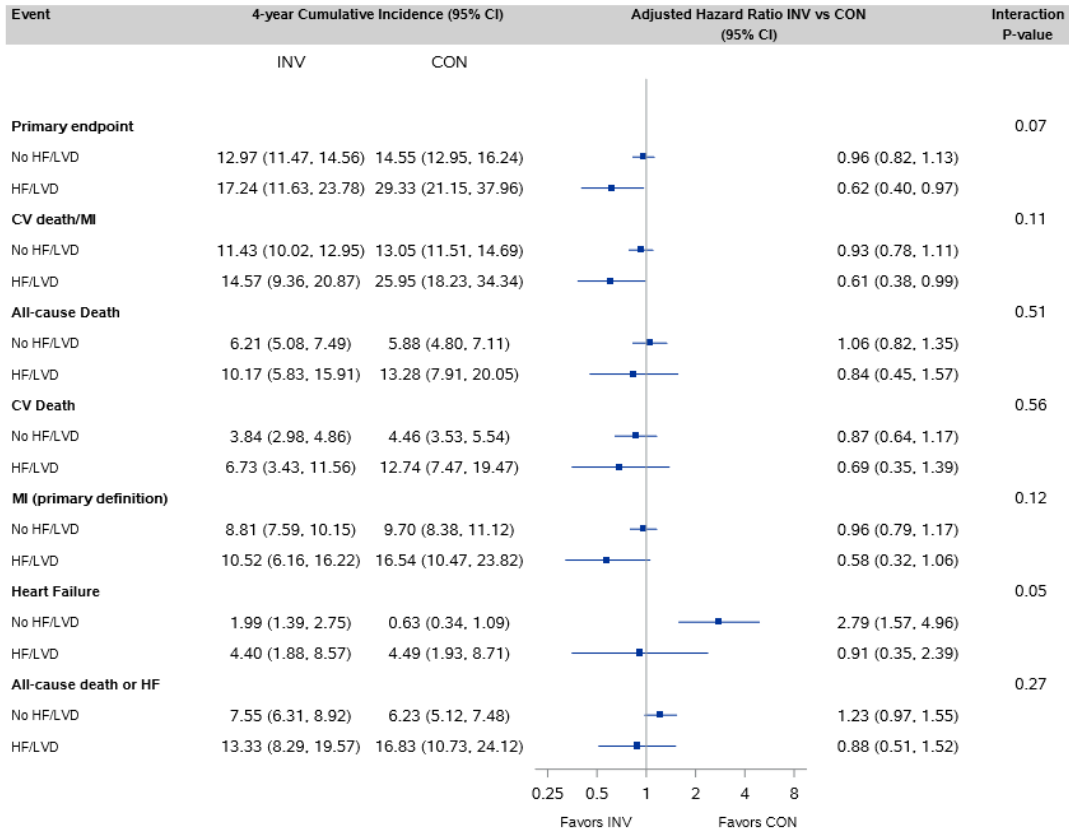

### 3. Supplemental Statistical Methods

#### Imputation of LVEF values

For some patients ejection fraction was available in a categorical (35-44, 45-54, 55+) but not continuous form. We used a multiple imputation procedure to convert these patients' categorical ejection fraction values into continuous. The statistical techniques used for multiple imputation include chained equations and predictive mean matching (PMM). The particular algorithm used to implement PMM is Van Buuren's Type 1 matching. For the associations between baseline continuous LVEF and trial endpoints that are reported in supplemental table 4, models were fit in each of the 100 imputed datasets and hazard ratios come from combining the parameter estimates using SAS PROC MIANALYZE. For the figures that use continuous EF, we averaged the LVEF values across the 100 imputed datasets so we would have a single LVEF per person to plot.

#### Calculating 95% confidence intervals for the differences in the CIF estimates

The CIF and standard errors for each strata were used to calculate confidence limits using the formula:  $(CIF_{inv} - CIF_{con}) \pm 1.96 \sqrt{(se_{inv}^2 + se_{con}^2)}$ . Standard errors were based on the theory of counting processes<sup>30</sup>.

#### Calculation of interaction p-values for the test of differences in CIF differences

The interaction p-values are calculated from unadjusted cumulative incidence rates at 4 years. The chi-square statistic corresponding to the interaction p-value was calculated using matrix algebra as follows:

$$X = (C_2 D)' [C_2 V C_2]^{-1} (C_2 D)$$

where  $C_2 = (1 \ -1)$ , D is a vector of  $CIF_{inv} - CIF_{con}$  differences for those with and without prior HF/LVD, and V is a diagonal covariance matrix.

## Reference

30. Aalen, O. Nonparametric Estimation of Partial Transition Probabilities in Multiple Decrement Models. *Annals of Statistics*. 1978;6:534–545.

## **I. ISCHEMIA Committee, CCC, Trial-Related Personnel**

### **Past and Current Committee Members**

#### **Leadership Committee**

Judith S. Hochman (Chair)  
David J. Maron (Co-Chair)  
William Boden (Co-Principal Investigator)  
Bruce Ferguson (Co-Principal Investigator)  
Robert Harrington (Co-Principal Investigator)  
Gregg W. Stone (Co-Principal Investigator)  
David Williams (Co-Principal Investigator)

#### **Executive Committee**

Judith S. Hochman (Chair)  
David J. Maron (Co-Chair)  
Karen P. Alexander  
Sripal Bangalore  
Jeffrey Berger  
William Boden  
Robert Harrington  
Daniel Mark  
Sean M. O'Brien  
Harmony R. Reynolds  
Yves Rosenberg  
Leslee J. Shaw  
John Spertus  
Gregg W. Stone

#### **Steering Committee**

Judith S. Hochman (Chair)  
David J. Maron (Co-Chair)  
*Members of Executive Committee*  
Christie Ballantyne\*  
Daniel Berman  
Rafael Beyar\*  
Balram Bhargava  
Chris Buller\*  
Antonio (Tony) Carvalho\*\*  
Bernard R. Chaitman  
Rafael Diaz\*  
Rolf Doerr  
Vladimir Dzavik  
Bruce Ferguson  
Shaun Goodman

Gilbert Gosselin  
Rory Hachamovitch\*  
Christian Hamm\*  
Claes Held  
Malte Helm\*  
Kurt Huber\*  
Lixin Jiang  
Matyas Keltai  
Shun Kohsaka  
Irene Lang\*  
Renato Lopes  
Jose Lopez-Sendon  
Aldo Maggioni  
John Mancini  
C. Noel Bairey Merz  
James Min  
Eric Peterson\*  
Michael H. Picard  
Witold Ruzyllo  
Joseph Selvanayagam  
Roxy Senior  
Tali Sharir  
Gabriel Steg  
Hanna Szwed  
Frans Van de Werf\*  
William Weintraub  
Harvey White  
David Williams

**Optimal Medical Therapy Committee**

William Boden (Co-Chair)  
David J. Maron (Co-Chair)  
Christie Ballantyne  
Sripal Bangalore  
Karen Calfas\*\*  
Bernard R. Chaitman  
Mary Ann Champagne  
Michael Davidson  
Jerome Fleg  
Peter A. McCullough  
Jonathan Newman  
Peter Stone

## **Optimal Revascularization Therapy Planning Committee**

Gregg W. Stone (Chair)

### **Subcommittee: CABG**

Bruce Ferguson (Co-Chair)

Philippe Menasche (Co-Chair)

Sripal Bangalore

Michael Davidson\*\*

Stephen Fremes

Robert Guyton

Michael Mack

Fred Mohr

Anupama Rao

Joe Sabik

Oz Shapira

David Taggart

James Tatoulis

### **Subcommittee: PCI**

David Williams (Co-Chair)

Sripal Bangalore

Jim Blankenship

Sorin Brener

Chris Buller

Antonio Colombo

Bernard de Bruyne

Philippe G n reux

Robert Harrington

Dean Kereiakes

Thierry Lefevre

Jeffrey Moses

## **Clinical Events**

### **Endpoint Definition Panel**

Bernard R. Chaitman (Chair)

Karen P. Alexander

Judith S. Hochman

Ken Mahaffey

David J. Maron

Gregg W. Stone

Harvey White

### **Clinical Event Review Committee**

Bernard R. Chaitman (Chair)

Salvador Cruz-Flores

Nicholas Danchin  
Eli Feen  
Mario J. Garcia  
Paul Hauptman  
Abhay A. Laddu  
Eugene Passamani  
Ileana L. Pina  
Maarten Simoons  
Hicham Skali  
Kristian Thygesen  
David Waters

**CEC Administrative Group**

Karen P. Alexander  
Patricia Endsley\*  
Gerard Esposito  
Jeffrey Kanters  
John Pownall  
Dimitrios Stournaras

**ISCHEMIA Imaging Committee**

Leslee J. Shaw (Chair)  
Daniel Berman  
Matthias Friedrich  
Rory Hachamovitch  
Raymond Kwong  
John Mancini  
James Min  
Dana Oliver  
Michael H. Picard  
Harmony R. Reynolds

**Biostatistics Planning Committee**

Frank Harrell (Chair)  
Jeffrey Blume  
Kerry Lee  
Sean M. O'Brien

**BioRepository Committee**

Jeffrey Berger (Chair)  
Claes Held  
Iftikhar Kullo  
Bruce McManus  
Kristin Newby

**EQOL Committee**

Daniel Mark (Co-Chair)  
John Spertus (Co-Chair)  
David Cohen  
William Weintraub

**Recruitment for Women & Minorities**

C. Noel Bairey Merz (Chair)  
Raffaele Bugiardini  
Jelena Celutkiene  
Jorge Escobedo  
Angela Hoye  
Radmila Lyubarova  
Deirdre Mattina  
Jesus Peteiro  
Harmony R. Reynolds  
Paola Smanio

**Publications**

David J. Maron (Chair)  
Karen P. Alexander  
Sripal Bangalore  
Jeffrey Berger  
William Boden  
Robert Harrington  
Judith S. Hochman  
Sean M. O'Brien  
Harmony R. Reynolds  
Yves Rosenberg  
Gregg W. Stone

**Publication Subcommittees****Economics**

Daniel Mark (Chair)  
John Spertus

**QOL**

John Spertus (Chair)  
Daniel Mark

**Stress Testing**

Leslee J. Shaw (Chair)  
Dan Berman  
Bernard R. Chaitman  
Jerome Fleg



Raymond Kwong  
Michael H. Picard  
Harmony R. Reynolds  
Roxy Senior

**CCTA**

James Min (Chair)  
Jonathan Leipsic  
John Mancini

**Angiography/Optimal Revascularization Therapy**

Gregg W. Stone (Chair)  
Ziad Ali (Co-chair)  
Sripal Bangalore  
T. Bruce Ferguson  
David Williams

(Philippe Genereux, former Chair, Angiography Subcommittee)\*

**Optimal Medical Therapy**

William Boden (Co-Chair)  
David J. Maron (Co-Chair)  
Jerome Fleg  
Jonathan Newman

**Biorepository**

Jeffrey Berger (Chair)

**CEC**

Bernard R. Chaitman (Chair)  
Karen P. Alexander

**CKD**

Sripal Bangalore (Chair)  
Karen P. Alexander  
Jerome Fleg  
Judith S. Hochman  
David J. Maron  
Roy Mathew  
Sean M. O'Brien  
Harmony R. Reynolds  
Mandeep Sidhu

**CIAO**

Harmony R. Reynolds (Chair)

**DSMB Members**

Lawrence Friedman (Chair)  
Jeffrey Anderson

Jessica Berg \*  
David DeMets  
C. Michael Gibson  
Gervasio Lamas  
Nicole Deming  
Jonathan Himmelfarb  
Pamela Ouyang  
Pamela Woodard

### **Independent Statistical Analysis Center for DSMB Reporting**

Frank Harrell  
Samuel Nwosu

### **NHLBI Program Staff**

#### **Project Office**

Yves Rosenberg (Project Officer)  
Jerome Fleg  
Ruth Kirby

#### **Statisticians**

Neal Jeffries

### **ISCHEMIA Clinical Coordinating Center (CCC)**

#### **Study Leadership**

Judith S. Hochman (Study Chair, Director of CCC)  
David J. Maron (Study Co-Chair, Co-Director of CCC, US Country Leader)

#### **CCC Faculty**

Sripal Bangalore (Optimal Revascularization Therapy CCC Director, Regional Leader)  
Jeffrey Berger (Director of the Biorepository, Regional Leader)  
William Boden (US-VA Regional Leader)  
Jonathan Newman (Optimal Medical Therapy CCC Director, Regional Leader)  
Harmony R. Reynolds (Associate Director of CCC, CCC Imaging Lead, Regional Leader)  
Mandeep Sidhu (US-VA Regional Co-Leader)

#### **Program Directors**

Jean E. Denaro\*\*  
Stephanie Mavromichalis

#### **Project Managers**

Kevin Chan  
Gia Cobb\*  
Aira Contreras  
Diana Cukali\*  
Stephanie Ferket\*  
Andre Gabriel\*

Antonietta Hansen\*

Arline Roberts

***Clinical Research Associates***

Michelle Chang

Sharder Islam\*

Graceanne Wayser\*

Solomon Yakubov\*

Michelle Yee

***Clinical Trial Assistants***

Caroline Callison

Isabelle Hogan

Albertina Qelaj\*

Charlotte Pirro\*

Kerrie Van Loo

Brianna Wisniewski\*

***Grants and Finance Administration***

Margaret Gilsenan (Grants Manager)

Bevin Lang

Samaa Mohamed

***Publications Team***

Jihyun Lyo (Publications Manager)

Nadia Gakou

***Data Analyst***

Vincent Setang\*

Mark Xavier\*

**Statistical and Data Coordinating Center (SDCC)**

Sean M. O'Brien (Principal Investigator)

Karen P. Alexander (Co-Principal Investigator)

Akshay Bagai\*

Samuel Broderick

Michelle Crowder

Derek Cyr

Patricia Endsley

Jyotsna Garg

Xiangqiong Gu

Robert

Harrington\*

Lisa Hatch

Anne Heath\*

Zhen Huang

Jeffrey Kanters

Kerry Lee\*  
Jeff Leimberger  
Jill Marcus  
Courtney Page  
Wanda Parker\*  
Wayne Pennachi  
John Pownall  
Frank Rockhold  
Susanna Stevens  
Allegra Stone  
Dimitrios  
Stournaras  
Omar Thompson  
Sheri Ussery  
Jennifer White\*  
Mary (Kaye)  
Williams  
Weibing Xing  
Songlin Zhu

**Economics and Quality of Life Coordinating Center (EQOL CC)**

*Duke Clinical Research Institute, Durham, NC*

Daniel B. Mark (Principal Investigator)  
Kevin Anstrom  
Khaula Baloch  
Janet Blount  
Patricia Cowper  
Linda Davidson-Ray  
Laura Drew  
Tina Harding  
J David Knight  
Diane Minshall Liu  
Betsy O'Neal  
Thomas Redick

*Saint Luke's Mid America Heart Institute, Kansas City, MO*

John Spertus (Principal Investigator)  
Philip Jones  
Karen Nugent  
Grace Jingyan Wang

**ISCHEMIA Imaging Coordinating Center (ICC)**

Leslee J. Shaw (Principal Investigator)

Lawrence Phillips

Abhinav Goyal

Holly Hetrick

Dana Oliver

*Nuclear Core Lab*

Daniel Berman (Director)

Sean W. Hayes (Co-Director)

John D. Friedman

R. James Gerlach

Mark Hyun

Romalisa Miranda-Peats

Piotr Slomka

Louise Thomson

*CMR Core Lab*

Raymond Y. Kwong (Director)

Matthias Friedrich (Director)\*

Francois Pierre Mongeon (Co-Director)

Steven Michael

*Echo Core Lab*

Michael H. Picard (Director)

Judy Hung

Marielle Scherrer-Crosbie

Xin Zeng

**ECG/ETT CoreLab**

Bernard R. Chaitman (Director)

Jane Eckstein

Bandula Guruge

Mary Streif

**Angiographic Core Lab**

Ziad Ali (Director)

Philippe Genereux (Director)\*

Maria A. Alfonso

Maria P. Corral

Javier J. Garcia

Jennifer Horst

Ivana Jankovic

Maayan Konigstein

Mitchel B. Lustre\*

Yolayfi Peralta

Raquel Sanchez

**CCTA Core Lab**

James Min (Director)

Reza Arsanjani

Matthew Budoff

Kimberly Elmore

Millie Gomez

Cameron Hague

Niree Hindoyan

Jonathan Leipsic

GB John Mancini

Rine Nakanishi

M. Barbara Srichai-Parsia

Eunice Yeoh

Tricia Youn

**Academic Research Organizations (AROs)**

**Associazione Nazionale Medici Cardiologi Ospedalieri (ANMCO) -Italy & Switzerland**

Aldo P. Maggioni (Country Leader)

Francesca Bianchini

Martina Ceseri

Andrea Lorimer

Marco Magnoni

Francesco Orso

Laura Sarti

Martinia Tricoli\*

**Brazilian Clinical Research Institute (BCRI) - Brazil**

Antonio Carvalho (Country Leader)\*\*

Renato Lopes (Country Leader)

Lilian Mazza Barbosa

Tauane Bello Duarte

Tamara Colaiácovo Soares

Julia de Aveiro Morata

Pedro Carvalho

Natalia de Carvalho Maffei

Flávia Egydio\*

Anelise Kawakami\*

Janaina Oliveira\*

Elissa Restelli Piloto\*

Jaqueline Pozzibon\*

**Canadian Heart Research Centre (CHRC) - Canada**

Shaun Goodman (Country Leader)

Diane Camara

Neamat Mowafy

Caroline Spindler

China Oxford Centre for International Health Research - China

Lixin Jiang (Country Leader)

Hao Dai

Fang Feng

Jia Li

Li Li\*

Jiamin Liu

Qiulan Xie

Haibo Zhang

Jianxin Zhang

Lihua Zhang

Liping Zhang

Ning Zhang

Hui Zhong

Estudios Clínicos Latino America (ECLA) - Argentina

Rafael Diaz\*

Claudia Escobar

Maria Eugenia Martin\*

Andrea Pascual\*

Foundation for Biomedical Research of La Paz University Hospital (FIBHULP) - Spain

José Lopez-Sendon (Country Leader)

Paloma Moraga

Victoria Hernandez

Almudena Castro

Maria Posada\*

Sara Fernandez

José Luis Narro Villanueva

Rafael Selgas

French Alliance for Cardiovascular Trials (FACT) - France

Gabriel Steg (Country Leader)

Helene Abergel

Jean Michel Juliard

Green Lane Coordinating Centre Ltd. (GLCC) -Malaysia, New Zealand, Singapore, Taiwan, Thailand

Harvey White (Country Leader)

Caroline Alswailer

KU Leuven Research & Development - Belgium\*

Frans Van de Werf (Country Leader)

Kathleen Claes

Kaatje Goetschalckx

Ann Luyten

Valerie Robesyn

South Australian Health and Medical Research Institute Ltd (SAHMRI) - Australia

Joseph B. Selvanayagam (Country Leader)

Deirdre Murphy

**Contract Research Organizations (CROs) for ISCHEMIA Trial**

FOCUS Clinical Research Center d.o.o. Belgrade - Serbia

Nevena Garcevic

Jelena Stojkovic

iProcess Global Research Inc. - India

Asker Ahmed

Richa Bhatt

Nitika Chadha\*

Vijay Kumar\*

Sadath Lubna\*

Pushpa Naik

Shruti Pandey\*

Karthik Ramasamy\*

Mohammed Saleem

Pratiksha Sharma

Hemalata Siddaram\*

*\*past members / past organizations*

*\*\*deceased*



## II. Site Personnel

| Country<br>(No. Randomizations) | Investigator(s)                | Study Coordinator(s)             | City & State<br>(if applicable) | Institution (No.<br>Randomizations)                           |
|---------------------------------|--------------------------------|----------------------------------|---------------------------------|---------------------------------------------------------------|
| *United States (853)            |                                |                                  |                                 |                                                               |
| Country Leader                  |                                |                                  |                                 |                                                               |
| David J. Maron, MD              |                                |                                  |                                 |                                                               |
| Regional Leader for<br>VA Sites |                                |                                  |                                 |                                                               |
| William E. Boden, MD            |                                |                                  |                                 |                                                               |
|                                 | Kreton Mavromatis,<br>MD       | John Doan, MD                    |                                 |                                                               |
|                                 | Jason Linefsky, MD             | Raven Lee, CCRP                  | Decatur, GA                     | Atlanta VA Medical<br>Center (139)                            |
|                                 |                                | Risha Patel                      |                                 |                                                               |
|                                 |                                | So Yang Cho                      |                                 |                                                               |
|                                 | Todd D. Miller, MD             | Susan Milbrandt                  | Rochester,<br>MN                | Mayo Clinic (50)                                              |
|                                 |                                | Dawn Shelstad                    |                                 |                                                               |
|                                 | Subhash Banerjee,<br>MD        | Preeti Kamath, BDS,<br>MHA, CCRP | Dallas, TX                      | V.A. North Texas<br>Health Care System<br>(35)                |
|                                 |                                | Ishita Tejani, BDS,<br>MS, MSPH  |                                 |                                                               |
|                                 | Harmony R.<br>Reynolds, MD     | Stanley E. Cobos, BA             |                                 |                                                               |
|                                 | Jonathan D.<br>Newman, MD, MPH | Kirsten J. Quiles, MS            |                                 |                                                               |
|                                 | Sripal Bangalore,<br>MD, MHA   | Raven R. Dwyer, MPH              |                                 |                                                               |
|                                 | Robert M. Donnino,<br>MD       | Dalisa Espinosa, MBS             | New York, NY                    | NYU Langone<br>Medical Center-<br>Bellevue Hospital<br>(26)   |
|                                 | Lawrence M.<br>Phillips, MD    |                                  |                                 |                                                               |
|                                 | Muhammed Saric,<br>MD, PhD     |                                  |                                 |                                                               |
|                                 | Khaled Abdul-Nour,<br>MD       | Allison Schley, BS               | Detroit, MI                     | Henry Ford Health<br>System (21)                              |
|                                 |                                | Heather Golden                   |                                 |                                                               |
|                                 |                                | Hermine Osseni, MS               |                                 |                                                               |
|                                 |                                | Charlene Wiyarand                |                                 |                                                               |
|                                 | Peter H. Stone, MD             | Peter Douglass, BA               | Boston, MA                      | Brigham & Women's<br>Hospital, Harvard<br>Medical School (21) |
|                                 |                                | Hayley Pomeroy, BA               |                                 |                                                               |
|                                 |                                | Alexandra Craft, BA              |                                 |                                                               |
|                                 |                                | Bethany Harvey, BA               |                                 |                                                               |
|                                 | James J. Jang, MD              | Olivia Anaya                     |                                 |                                                               |
|                                 | Gennie Yee, MD                 | Phoebe Goold, RN                 | San Jose, CA                    | Kaiser Permanente<br>San Jose (18)                            |
|                                 |                                | Steven Giovannone                |                                 |                                                               |
|                                 | Steven Weitz, MD               | Lori Pritchard, RN               | Schenectady,<br>NY              | Cardiology<br>Associates of<br>Schenectady P.C.<br>(17)       |

|                                                                                                                                                                                                                                                                                                                                                 |                                                                                                    |                 |                                                             |
|-------------------------------------------------------------------------------------------------------------------------------------------------------------------------------------------------------------------------------------------------------------------------------------------------------------------------------------------------|----------------------------------------------------------------------------------------------------|-----------------|-------------------------------------------------------------|
| Suzanne Arnold, MD<br>James Henry O'Keefe, Jr, MD (PI from 2012-2016)                                                                                                                                                                                                                                                                           | Rosann Gans, RN<br>Paul Kennedy, RN                                                                | Kansas City, MO | Saint Luke's Hospital (17)                                  |
| Michael D. Shapiro, DO                                                                                                                                                                                                                                                                                                                          | Shobana Ganesan, PhD<br>David Schlichting, LPN<br>Aynun Naher                                      | Portland, OR    | Oregon Health & Science University (17)                     |
| Mohammad El-Hajjar, MD<br>Mandeep S. Sidhu, MD, MBA<br>Steven A. Fein, MD<br>Mikhail T. Torosoff, MD, PhD<br>Radmila Lyubarova, MD<br>Sulagna Mookherjee, MD<br>Krzysztof Drzymalski, MD<br>Edward O. McFalls, MD, PhD<br>Santiago A. Garcia, MD<br>Stefan C. Bertog, MD<br>Rizwan A. Siddiqui, MD<br>Areef Ishani, MD<br>Ronnell A. Hansen, MD | Wendy L. Stewart, MS<br>Kristin M. Salmi, BS                                                       | Albany, NY      | Albany Medical Center Hospital (16)                         |
|                                                                                                                                                                                                                                                                                                                                                 | Debra K. Johnson, RN<br>Rebekah R. Herrmann, RN                                                    | Minneapolis, MN | Minneapolis VAMC (15)                                       |
| Michel Georges Khouri, MD                                                                                                                                                                                                                                                                                                                       | Kristine Arges<br>Melissa LeFevre<br>Jennifer Tomfohr<br>Kimberly Ann Byrne                        | Durham, NC      | Duke University Medical Center (15)                         |
| Jonathan L. Goldberg, MS, MD                                                                                                                                                                                                                                                                                                                    | Taissa Zappernick                                                                                  | Cleveland, OH   | Louis Stokes Cleveland Veterans Affairs Medical Center (14) |
| Richard Goldweit, MD                                                                                                                                                                                                                                                                                                                            | Sallie Canada<br>Meghana Kakade<br>Patricia Mieses<br>Stanley E. Cobos, BA<br>Raven R. Dwyer, MPH  | Englewood, NJ   | Englewood Hospital and Medical Center (13)                  |
| Ronny A. Cohen, MD<br>Brooks Mirrer, MD<br>Victor Navarro, MD                                                                                                                                                                                                                                                                                   | Dalisa Espinosa, MBS<br>Kirsten J. Quiles, MS<br>Magdalena Rantinella, BS<br>Jessica Rodriguez, BS | Brooklyn, NY    | NYU-HHC Woodhull Hospital (12)                              |

|                                                                                                                                                                                                                   |                                                                                        |                                             |                                                                                 |
|-------------------------------------------------------------------------------------------------------------------------------------------------------------------------------------------------------------------|----------------------------------------------------------------------------------------|---------------------------------------------|---------------------------------------------------------------------------------|
| David E.<br>Winchester, MD,<br>MS<br>Marvin Kronenberg,<br>MD<br>Philip Rogal, MD<br>Christopher<br>McFarren, MD                                                                                                  | Olivia Mancilla, BS<br>Susan Stinson, RN<br><br>Terry Weyand<br><br>Sherron C. Crook   | Gainesville,<br>FL<br><br><br>Nashville, TN | Malcom Randall<br>VAMC (11)<br><br>Vanderbilt University<br>Medical Center (11) |
| John F. Heitner, MD                                                                                                                                                                                               | Jean Ho<br>Saadat Khan<br>Mahmoud Mohamed<br>Mary R. Soltau, RN<br>Delsa K. Rose, RN   | Brooklyn, NY                                | New York -<br>Presbyterian/Brooklyn<br>Methodist Hospital<br>(10)               |
| Ira M. Dauber, MD                                                                                                                                                                                                 | Rebecca J. Wimmer,<br>RN<br>Kathy E. Siegel, RN<br>Susan Derbyshire                    | Littleton, CO                               | South Denver<br>Cardiology<br>Associates, P.C. (10)                             |
| Charles Cannan,<br>MD                                                                                                                                                                                             | Michelle Dixon<br>Gerald Leonard<br>Ciarra Heard, LVN                                  | Portland, OR                                | Providence Heart and<br>Vascular Institute (10)                                 |
| Sriram Sudarshan,<br>MD                                                                                                                                                                                           | Viviana Gabriel, LVN<br>Sukie Desire                                                   | Wichita Falls,<br>TX                        | Wichita Falls Heart<br>Clinic (9)                                               |
| Puja K. Mehta, MD<br>Michael McDaniel,<br>MD<br>Stamatios Lerakis,<br>MD<br>Arshed Quyyumi,<br>MD<br>Nanette K. Wenger,<br>MD<br>Chester M.<br>Hedgepeth, MD,<br>PhD<br>Heather Hurlburt,<br>MD<br>Alan Rosen, MD | Fauzia Rashid, PhD<br><br>Senait Asier<br><br>Keyur Patel<br><br>Jennifer Gillis, APRN | Atlanta, GA                                 | Emory University (9)                                                            |
| Heather Hurlburt,<br>MD<br>Alan Rosen, MD                                                                                                                                                                         | Megan Manocchia,<br>RN<br>Susan Moore, RN<br>Elizabeth Congdon<br>Gail Brandt          | Warwick, RI                                 | Kent Hospital (9)                                                               |
| Zakir Sahul, MD                                                                                                                                                                                                   | Nora Marchelletta<br>Kristina Wippler                                                  | Ypsilanti, MI                               | Michigan Heart, PC<br>(9)                                                       |
| David Booth, MD<br>Steve Leung, MD<br>Ahmed Abdel-Latif,<br>MD, PhD<br>Hassan Reda, MD<br>Khaled Ziada, MD                                                                                                        | Yvonne Taul, RN<br>Jennifer Isaacs, MS<br>Viktoria Bulkley, RN<br><br>Caroline Rodgers | Lexington, KY                               | University of<br>Kentucky (8)                                                   |

|                                                                                                                                                                                                      |                                                                                                                     |                           |                                                                                            |
|------------------------------------------------------------------------------------------------------------------------------------------------------------------------------------------------------|---------------------------------------------------------------------------------------------------------------------|---------------------------|--------------------------------------------------------------------------------------------|
| Sampoornima Setty, MD                                                                                                                                                                                | Kimberly E. Halverson, RHIT<br>Christine Roraff, RN<br>Jonean Thorsen, RN                                           | La Crosse, WI             | Gundersen Lutheran Medical Center (8)                                                      |
| Rajat S. Barua, MD, PhD                                                                                                                                                                              | Amarachi Ojajuni<br>Oni Olurinde<br>Kamalakar Surineni                                                              | Kansas City, MO           | Kansas City VA Medical Center (8)                                                          |
| Fadi Hage, MD<br>Christiano Caldeira, MD<br>James E. Davies, MD<br>Massoud Leesar, MD<br>Jaekyeong Heo, MD<br>Amy Iskandrian, MD<br>Firas Al Solaiman, MD<br>Satinder Singh, MD<br>Khaled Dajani, MD | Badhma Valaiyapathi, MD                                                                                             | Birmingham, AL            | UAB Vascular Biology and Hypertension Program (8)                                          |
| Mohammad El-Hajjar, MD<br>Paul Der Mesropian, MD<br>Joseph Sacco, MD<br>Brian McCandless, MD<br>Marisa Orgera, MD<br>Mandeep S. Sidhu, MD, MBA (2012-2016 )                                          | Carol M. Kartje, BSN<br>Michele Rawlins, NP<br>Jennifer Thomson, MA                                                 | Maywood, IL<br>Albany, NY | Loyola University Medical Center (8)<br>Samuel Stratton VA Medical Center of Albany NY (7) |
| Imran Arif, MD<br>Hanan Kerr, MD                                                                                                                                                                     | Mary Colleen Rogge, RN<br>Julie Bunke , BA<br>Kendra Unterbrink , PA<br>Jacqueline Fannon, RN<br>Cynthia Burman, NP | Cincinnati, OH            | Cincinnati VA Medical Center (7)                                                           |
| Jorge F. Trejo (Gutierrez), MD<br>Gerald Fletcher, MD<br>Gary E. Lane, MD<br>Lynn M. Neeson, DNP<br>Pragnesh P. Parikh, MD<br>Peter M. Pollak, MD                                                    | Marcia F. Dubin, CCRP                                                                                               | Jacksonville, FL          | Mayo Clinic Florida (7)                                                                    |

|                                                                                                                                                                                                                                             |                                                                                                                |                             |                                                              |
|---------------------------------------------------------------------------------------------------------------------------------------------------------------------------------------------------------------------------------------------|----------------------------------------------------------------------------------------------------------------|-----------------------------|--------------------------------------------------------------|
| Brian P. Shapiro,<br>MD<br>Kevin Landolfo, MD<br>Anthony<br>Gemignani, MD<br>Daniel O'Rourke,<br>MD                                                                                                                                         | Sarah Beaudry, RN                                                                                              | White River<br>Junction, VT | VAMC-White River<br>Junction (7)                             |
| Judith L. Meadows,<br>MD                                                                                                                                                                                                                    | Stephanie A. Tirado,<br>RN<br>Janet Halliday<br>Pamela Julian                                                  | West Haven,<br>CT           | VA Connecticut<br>Healthcare System<br>(7)                   |
| Jason T. Call, MD                                                                                                                                                                                                                           | Stephanie, M. Lane,<br>RN, BSN, CCRN<br>Jennifer L. Stanford,<br>RN, MSN                                       | Winchester,<br>VA           | Winchester<br>Cardiology and<br>Vascular Medicine,<br>PC (7) |
| Joseph Hannan,<br>MD<br>Robert Bojar, MD<br>Deepti Kumar, MD<br>John Mukai, MD                                                                                                                                                              | Patricia Arsenault, RN<br>Pamela Sigel, RN                                                                     | Worcester,<br>MA            | Saint Vincent<br>Hospital at Worcester<br>Medical Center (7) |
| Edward T. Martin,<br>MS, MD                                                                                                                                                                                                                 | Miriam Brooks                                                                                                  | Tulsa, OK                   | Oklahoma Heart<br>Institute (7)                              |
| Gabriel Vorobiof,<br>MD                                                                                                                                                                                                                     | Ladda Douangvila<br>Rubine Gevorgyan<br>Fatima Ranjbaran, RN                                                   | Los Angeles,<br>CA          | Ronald Reagan<br>UCLA Medical Center<br>(7)                  |
| Alec Moorman, MD                                                                                                                                                                                                                            | Bryn Smith, BS<br>Carly Ohmart                                                                                 | Seattle, WA                 | University of<br>Washington Medical<br>Center (7)            |
| Scott Kinlay, MBBS,<br>PhD<br>Robert J.<br>Hamburger, MD<br>Thomas P. Rocco,<br>MD<br>Deepak L. Bhatt,<br>MD, MPH<br>Kevin Croce, MD,<br>PhD<br>Jacquelyn A Quin,<br>MD<br>Jati Anumpa, MD<br>Marco Zenati, MD,<br>MSc<br>David P Faxon, MD | Samantha Ly, MA<br>Margot C. Quinn, BA<br>Sara Temiyasathit,<br>PhD<br>Jacquelyn Do, MPH<br>Desiree Tobin, MPH | West<br>Roxbury, MA         | VA Boston<br>Healthcare System<br>(6)                        |
| Glenn Rayos, MD                                                                                                                                                                                                                             | Jennifer Langdon<br>Marcia Werner Bayer<br>Amanda O'Malley                                                     | Daytona<br>Beach, FL        | Daytona Heart Group<br>(6)                                   |
| Ashraf Seedhom,<br>MD<br>Lance Sullenberger,<br>MD                                                                                                                                                                                          | Erin Orvis<br>Mandy Murphy, RN                                                                                 | Albany, NY<br>Bethesda, MD  | Capital Cardiology<br>Associates (6)                         |

|                                 |                                                             |                     |                                                        |
|---------------------------------|-------------------------------------------------------------|---------------------|--------------------------------------------------------|
| Gregory Kumkumian, MD           | Ann Greenberg, RN<br>Margaret Iraola, RN                    |                     | NIH Heart Center at Suburban Hospital (6)              |
| Steven P. Sedlis, MD            |                                                             |                     |                                                        |
| Robert M. Donnino, MD           | Leandro C. Maranan, CCRC                                    | New York, NY        | VA New York Harbor Health Care System (6)              |
| Jeffrey Lorin, MD               |                                                             |                     |                                                        |
| Jacqueline E. Tamis-Holland, MD |                                                             |                     |                                                        |
| Robert Kornberg, MD             | Ammy Malinay, RN                                            | Ridgewood, NJ       | Mount Sinai Saint Luke's Hospital (6)                  |
| Robert Leber, MD                |                                                             |                     |                                                        |
| Souheil Saba, MD                |                                                             |                     |                                                        |
| Michael W. Lee, MD              |                                                             |                     |                                                        |
| Delano R. Small, MD             |                                                             |                     |                                                        |
| Wassim Nona, MD                 | Candice P. Edillo, RN                                       | Southfield, MI      | Providence - Providence Park Hospital (6)              |
| Patrick B. Alexander, MD        |                                                             |                     |                                                        |
| Iram Rehman, MD                 |                                                             |                     |                                                        |
| Umesh Badami, MD                | Ann Ostrander, RN<br>Stephanie Wasmiller, RN                | Saginaw, MI         | Covenant Medical Center, Inc. (5)                      |
| Kevin Marzo, MD                 | Wendy Drewes, RN<br>Dipti Patel, RN                         | Mineola, NY         | NYU Winthrop (5)                                       |
| Inga H. Robbins, MD             |                                                             |                     |                                                        |
| Howard A. Levite, MD            | Jackie M White, RN, BSN<br>CCRC                             | Pomona, NJ          | AtlantiCare Regional Medical Center (5)                |
| Sanjay Shetty, MD               | Alison Hallam                                               |                     |                                                        |
| Mayuri Patel, MD                |                                                             |                     |                                                        |
| Glenn S. Hamroff, MD            | Benjamin J Spooner, RPA-C<br>Linda M Hollenweger, LPN, CCRC | Cortlandt Manor, NY | NYP Medical Medical Group Hudson Valley Cardiology (5) |
| Raymond W. Little, MD           | Holly Little                                                |                     |                                                        |
| Brandi D. Zimbelman, FNP-C      | Tiffany Little                                              | Houston, TX         | Houston Heart & Vascular Associates (5)                |
| Charles Y. Lui, MD              |                                                             |                     |                                                        |
| Brigham R. Smith, MD            |                                                             |                     |                                                        |
| Daniel P. Vezina, MD, MSC       |                                                             |                     |                                                        |
| Lillian L. Khor, MBBCh, MSc     | Nona A Eskelson, RN                                         | Salt Lake City, UT  | Salt Lake City VA Medical Center (4)                   |
| Josephine D. Abraham, MD, MPH   |                                                             |                     |                                                        |
| David A. Bull, MD               |                                                             |                     |                                                        |
| Stephen H. McKellar, MD, MSc    |                                                             |                     |                                                        |

|                            |                                 |                  |                                                     |
|----------------------------|---------------------------------|------------------|-----------------------------------------------------|
| David Booth, MD            | Yvonne Taul, RN                 |                  |                                                     |
| John Kotter, MD            | Caroline Rodgers, RN            |                  |                                                     |
| Ahmed Abdel-Latif, MD, PhD | Jennifer Isaacs, MS             | Lexington, KY    | Lexington VA Medical Center (4)                     |
|                            | Viktoria Bulkley                |                  |                                                     |
| Bob Hu, MD                 | Renee Kaneshiro                 | Palo Alto, CA    | Palo Alto Medical Foundation Research Institute (4) |
| Arthur J. Labovitz, MD     |                                 |                  |                                                     |
| Michael Berlowitz, MD      | Bonnie J. Kirby, RN, MSN        |                  |                                                     |
| Philip Rogal, MD           | Nhi N. Tran, MS                 | Tampa, FL        | University of South Florida (4)                     |
| Christopher McFarren, MD   | Catherine Jahrsdorfer, RN, BSN  |                  |                                                     |
| Fadi Matar, MD             |                                 |                  |                                                     |
| Christiano Caldeira, MD    |                                 |                  |                                                     |
| David J. Maron, MD         |                                 |                  |                                                     |
| Fatima Rodriguez, MD, MPH  | Reem Yunis, PhD                 |                  |                                                     |
| Ingela Schnittger, MD      | Jhina Patro                     | Stanford, CA     | Stanford University School of Medicine (4)          |
| William F. Fearon, MD      |                                 |                  |                                                     |
| Prakash Deedwania, MD      | Antonia Vega                    | Fresno, CA       | UCSF - Fresno Community Regional Medical Center (4) |
| Kiran Reddy, MD            | Hugo Bloise-Adames              |                  |                                                     |
|                            | Santa Jimenez                   |                  |                                                     |
| Joseph Sweeny, MD          | Nicole Saint Vrestil            | New York, NY     | Icahn School of Medicine at Mount Sinai (4)         |
|                            | Reyna Bhandari                  |                  |                                                     |
|                            | Danielle Schade                 |                  |                                                     |
| Christopher Spizzieri, MD  | Roxanne Yost                    | Camp Hill, PA    | Holy Spirit Hospital Cardiovascular Institute (4)   |
|                            |                                 |                  |                                                     |
|                            | Paula Beardsley                 |                  |                                                     |
| Claudia P Hochberg, MD     | Denise Fine                     | Boston, MA       | Boston Medical Center (4)                           |
|                            | Jana Tancredi, RN, MA/MSN, CCRN |                  |                                                     |
|                            | Patricia Arakelian              |                  |                                                     |
| William D. Salerno, MD     | Susan Mathus                    | Saddle Brook, NJ | Hackensack University Medical Center (4)            |
|                            | Deborah O'Neill                 |                  |                                                     |
|                            | Joy Burkhardt, CCRP             |                  |                                                     |
|                            | Suellen Hosino, RN, BSN, CCRP   |                  |                                                     |
| Ray Wyman, MD              |                                 | Torrance, CA     | Torrance Memorial Medical Center (4)                |
|                            |                                 |                  |                                                     |
|                            | Oksana A. Lubyayaya, BA         | Santa Ana, CA    | Coastal Heart Medical Group (4)                     |
|                            | Jose D. Salas, BS               |                  |                                                     |

|                              |                                  |                         |                                                          |
|------------------------------|----------------------------------|-------------------------|----------------------------------------------------------|
| Amer Zarka, MD               | Maria Aguirre                    |                         |                                                          |
| Anil V. Shah, MD             | Manu Dhawan                      |                         |                                                          |
|                              | Diana Parra                      |                         |                                                          |
|                              | Tri Tran                         |                         |                                                          |
|                              | Catherine Weick,<br>BSRT(R)(VI)  |                         |                                                          |
| Thomas Haldis, DO            | Katie Fowler-Lehman,<br>BSN      | Fargo, ND               | Sanford Health (4)                                       |
|                              | Natalie Spitzer, BSN             |                         |                                                          |
|                              | Casey Riedberger                 |                         |                                                          |
|                              | Catherine Weick                  |                         |                                                          |
|                              | Stanley E. Cobos, BA             |                         |                                                          |
| Jeffrey A. Kohn, MD          | Raven R. Dwyer, MPH              | New York, NY            | NYU New York<br>Medical Associates<br>(4)                |
|                              | Dalisa Espinosa, MBS             |                         |                                                          |
|                              | Kirsten J. Quiles, MS            |                         |                                                          |
|                              | Carrie Drum, RN                  |                         |                                                          |
| Saket Girotra, MD            | Kimberly Miller-Cox,<br>RN       | Iowa City, IA           | University of Iowa<br>Hospitals and Clinics<br>(4)       |
|                              | Amy Ollinger, RN                 |                         |                                                          |
|                              | Elizabeth Capasso-<br>Gulve      |                         |                                                          |
| Omar Almousalli,<br>MD       | Alaine Melanie Loehr             | Fairview<br>Heights, IL | Advanced Heart Care<br>Group (4)                         |
|                              | Marlowe Mosley                   |                         |                                                          |
| Mayil S. Krishnam,<br>MD     | Shirin Heydari, MS               |                         |                                                          |
| Jeffrey C. Milliken,<br>MD   | Andrea M. Lundeen,<br>MA         |                         |                                                          |
| Pranav M. Patel,<br>MD       | Edgar Karanjah, MD               |                         |                                                          |
| Arnold H. Seto, MD           | Wanda C. Marfori, MD             | Orange, CA              | University of<br>California Irvine<br>Medical Center (3) |
| Kevin T. Harley, MD          | Eduardo Hernandez-<br>Rangel, MD |                         |                                                          |
| Michael A. Gibson,<br>MD     | Pam Singh                        |                         |                                                          |
| Byron J. Allen, MD           |                                  |                         |                                                          |
|                              | Anne Marie Webb,<br>BSN          |                         |                                                          |
| Rita Coram, MD               | Ellie Fridell, BS                | Louisville, KY          | University of<br>Louisville (3)                          |
|                              | Heidi Wilson, BS                 |                         |                                                          |
| Sabu Thomas, MD,<br>MSc      | Angela Kim, BS                   |                         |                                                          |
| Ronald G Schwartz,<br>MD, MS | Patrick Wilmot, BS               | Rochester, NY           | University of<br>Rochester (3)                           |
| Wei Chen, MD, MS             |                                  |                         |                                                          |
| Mahfouz El<br>Shahawy, MD    | Ramona Stevens                   | Sarasota, FL            | Cardiovascular<br>Center of Sarasota<br>(3)              |
| James Stafford, MD           | Loriane Black                    | Baltimore, MD           | University of<br>Maryland Medical<br>Center (3)          |



|                                                                                                                             |                                                                                                                                                                                                              |                                            |                                                                                                         |
|-----------------------------------------------------------------------------------------------------------------------------|--------------------------------------------------------------------------------------------------------------------------------------------------------------------------------------------------------------|--------------------------------------------|---------------------------------------------------------------------------------------------------------|
|                                                                                                                             | Amber B. Hull, RN<br>Olivia J. Lim, RN<br>Helen C. Tucker                                                                                                                                                    |                                            |                                                                                                         |
| William B. Abernethy, MD                                                                                                    | Natasha C. Putnam, RN<br>Linda L. Hall<br>Tia Cauthren<br>Trish Tucker                                                                                                                                       | Asheville, NC                              | Asheville Cardiology Associates (3)                                                                     |
| Andrew Zurick, MD                                                                                                           | Hollie Horton<br>Jan Orga                                                                                                                                                                                    | Nashville, TN                              | Saint Thomas Hospital (3)                                                                               |
| Thomas M. Meyer, MD<br>Ronald G. Morford, MD<br>Bruce Rutkin, MD                                                            | Joyce R. White, MSN NP-C<br>Cynthia Baumann, RN                                                                                                                                                              | Lynchburg, VA                              | Stroobants Cardiovascular Center (3)                                                                    |
| Sabahat Bokhari, MD<br>Seth I. Sokol, MD<br>Jay Meisner, MD<br>Ihab Hamzeh, MD<br>Arunima Misra, MD                         | Vidya Seeratan<br>Magnolia Jimenez<br>Cidney Schultz, RN<br>Jeanne Russo, RN                                                                                                                                 | Manhasset, NY<br>New York, NY<br>Bronx, NY | Northwell Health - Manhasset (3)<br>Columbia University Medical Center (3)<br>Jacobi Medical Center (3) |
| Matthew Wall Jr., MD<br>Veronica Lenges De Rosen, MD<br>Mahboob Alam, MD<br>Michael C. Turner, MD<br>Thomas J. Mulhearn, MD | Zohra Huda, RN, BSN, CCRP<br>Araceli Boan<br>Christine R Hinton                                                                                                                                              | Houston, TX<br>Lake Charles, LA            | Baylor College of Medicine (3)<br>Cardiovascular Specialists of Southwest Louisiana (3)                 |
| Arnold P. Good, MD                                                                                                          | Beth A. Archer, BSN, RN<br>Julia S. Dionne, BA<br>Cheryl A. Allardyce, BSN, RN<br>Lindsey N. Sikora, BSN, RN<br>Jennifer H. Czerniak, RN<br>Jennifer A. Mull, MSN, RN<br>Elizabeth Ferguson<br>Frances Laube | Columbus, OH                               | Ohio Health Grant Medical Center (3)                                                                    |
| Nicolas W. Shammass, MD, MS                                                                                                 | Gail A Shammass, BSN, RN<br>Lori Christensen<br>Holly Park                                                                                                                                                   | Davenport, IA                              | Midwest Cardiovascular Research Foundation (3)                                                          |
| Robert Chilton, MD                                                                                                          | Joan Hecht                                                                                                                                                                                                   | San Antonio, TX                            | Audie Murphy V.A. (2)                                                                                   |

|                                        |                                                                                                                      |                  |                                                             |
|----------------------------------------|----------------------------------------------------------------------------------------------------------------------|------------------|-------------------------------------------------------------|
| Patricia K. Nguyen, MD                 | Davis Vo, BS<br>James Hirsch                                                                                         | Palo Alto, CA    | VA Palo Alto Healthcare System (2)                          |
| Matthew Jezior, MD                     | Jody Bindeman<br>Sara Salkind                                                                                        | Bethesda, MD     | Walter Reed National Military Medical Center (2)            |
| Paul C. Gordon, MD<br>Thomas Crain, MD | Dalisa Espinosa, MBS<br>Lori-Ann Desimone, BSN<br>Lina Felix-Stern<br>Jassira Gomes                                  | Providence, RI   | Miriam Hospital (2)                                         |
| Robert Stenberg, MD                    | Catherine Gordon, BSN<br>Aimee Mann<br>Theresa McCreary                                                              | Johnstown, PA    | Conemaugh Valley Memorial Hospital (2)                      |
| Ronald P. Pedalino, MD                 | Stanley E. Cobos, BA<br>Raven R. Dwyer, MPH<br>Dalisa Espinosa, MBS<br>Kirsten J. Quiles, MS<br>Stanley E. Cobos, BA | Brooklyn, NY     | NYU-HHC Kings County Hospital Center (2)                    |
| Joseph Wiesel, MD                      | Raven R. Dwyer, MPH<br>Dalisa Espinosa, MBS<br>Kirsten J. Quiles, MS<br>Candace Gopaul, BS                           | Flushing, NY     | New York University - Langone Cardiovascular Associates (2) |
| George J. Juang, MD                    | Karen Hultberg<br>Tauqir Huk<br>Afshan Hussain<br>Yesenia Zambrano, BS                                               | Brooklyn, NY     | Coney Island Hospital (2)                                   |
| Mohammed Al-Amoodi, MD                 | Sarah Medina Rodriguez<br>Trudie Milner                                                                              | Yuma, AZ         | Yuma Regional Medical Center (2)                            |
| David Wohns, MD                        | Abbey Mulder, RN<br>Stacie Van Oosterhout, MEd                                                                       | Grand Rapids, MI | Spectrum Health (2)                                         |
| Ellis W. Lader, MD                     | Martha Meyer, RN, MSN<br>Nancy L. Clapp, RN, BA, CCRC                                                                | Kingston, NY     | Mid Valley Cardiology (1)                                   |
| Michael Mumma, MD                      | Heather Barrentine<br>Jenne M. Jose, PA                                                                              | Sarasota, FL     | Sarasota Memorial Hospital (1)                              |
| Lekshmi Dharmarajan, MD                | Stanley E. Cobos, BA<br>Raven R. Dwyer, MPH<br>Dalisa Espinosa, MBS<br>Kirsten J. Quiles, MS<br>Jenne Manchery       | Bronx, NY        | NYU-HHC Lincoln Medical and Mental Health Center (1)        |

|                                       |                                                              |                   |                                                         |
|---------------------------------------|--------------------------------------------------------------|-------------------|---------------------------------------------------------|
| Joseph F.X. McGarvey Jr, MD           | Vera McKinney, RN<br>Linda Schwarz, RN<br>Scott M. Kaczowski | Doylestown, PA    | Doylestown Health Cardiology (1)                        |
| Thomas R. Downes, MD (till Dec. 2016) |                                                              |                   |                                                         |
| Gary J. Luckasen, MD (from Dec. 2016) | Adam J. Jaskowiak                                            | Loveland, CO      | Medical Center of the Rockies (1)                       |
|                                       | Joel Klitch                                                  |                   |                                                         |
| Benjamin Cheong, MD                   | Debra Dees                                                   | Houston, TX       | Baylor St. Luke's Medical Center (1)                    |
| Srinivasa Potluri, MD                 | Precilia Vasquez                                             | Plano, TX         | Baylor Research Institute at Legacy Heart Center (1) ** |
| Ronald A. Mastouri, MD                |                                                              |                   |                                                         |
| Jeffery A. Breall, MD, PhD            | Elise L. Hannemann, RN,CCRC                                  | Indianapolis, IN  | Indiana University/Krannert Institute of Cardiology (1) |
| George E. Revtyak, MD                 | Judy Mae Foltz, RN,CCRC                                      |                   |                                                         |
| Jonathan W. Bazeley, MD               | Emily DeRosa                                                 |                   |                                                         |
| Dayuan Li, MD                         | Beth Jorgenson<br>Joyce Riestenberg-Smith                    | St. Paul, MN      | HealthEast Saint Joseph's Hospital (1)                  |
| Kenneth Giedd, MD                     |                                                              | New York, NY      | Beth Israel Medical Center (1)                          |
| Wayne Old, MD                         | Rebecca Bariciano                                            | Chesapeake, VA    | Cardiovascular Associates, Ltd. (1)                     |
| Francis Burt, MD                      |                                                              | Bethlehem, PA     | Saint Luke's Hospital and Health Network (1)            |
| Kozhaya Sokhon, MD                    | Jessica Waldron<br>Michelle Mayon                            | Sugar land, TX    | Medicus Alliance Clinical Research Org., Inc. (1)       |
| Deepika Gopal, MD                     |                                                              | Plano, TX         | The Heart Hospital Baylor (1)                           |
| Uma S. Valeti, MD                     | Gretchen Ann Peichel, RN<br>Brandy Starks                    | Minneapolis, MN   | University of Minnesota (1)                             |
| Jon Kobashigawa, MD                   | Lucilla Garcia<br>Maria Thottam                              | Beverly Hills, CA | Cedars Sinai Medical Center (1)                         |

India (941)  
Country Leader  
Balram Bhargava, DM

|                                              |                       |         |                                  |
|----------------------------------------------|-----------------------|---------|----------------------------------|
|                                              | Anjali Anand, MSc     |         |                                  |
| Sajeev Chakanalil Govindan, MD, DNB, DM, PhD | Janitha Raj, B.Tech   | Calicut | Government Medical College (208) |
| Rajesh Gopalan Nair, MD, DNB, DM             | Reshma Ravindran, MSc |         |                                  |

|                                                                                                                                                            |                                                                                 |           |                                                                               |
|------------------------------------------------------------------------------------------------------------------------------------------------------------|---------------------------------------------------------------------------------|-----------|-------------------------------------------------------------------------------|
| Cholenahally<br>Nanjappa<br>Manjunath, MD, DM                                                                                                              | Rajalekshmi VS, MSc,<br>MScCRRA<br>Nandita Nataraj,<br>BE(Biotech)<br>PGDICRCDM | Bangalore | Sri Jayadeva Institute<br>of Cardiovascular<br>Sciences and<br>Research (149) |
| Nagaraja Moorthy,<br>MD, DM                                                                                                                                | Soundarya Nayak,<br>BE(Biotech)<br>PGDICRCDM                                    |           |                                                                               |
| Satvic Cholenahally<br>Manjunath, MD,DM                                                                                                                    | Mahevamma<br>Mylarappa, GNM<br>(General Nursing)                                |           |                                                                               |
| Suryaprakash<br>Narayanappa,<br>MBBS<br>Neeraj Pandit, MD,<br>DM                                                                                           | Sheromani Bajaj                                                                 | New Delhi | Dr Ram Manohar<br>Lohia Hospital (101)                                        |
| Ranjit Kumar Nath,<br>MD, DM                                                                                                                               | Vandana Yadav,<br>Msc,PGDACR<br>Girish Mishra, Msc,<br>PGDACR                   |           |                                                                               |
| S.K. Dwivedi, DM<br>V.S. Narain, DM<br>Sharad Chandra,<br>DM                                                                                               | Roma Tewari, PG<br>Meenakshi Mishra, PG<br>Shivali Patel                        | Lucknow   | King George's<br>Medical University,<br>Department of<br>Cardiology (100)     |
| Gurpreet S.<br>Wander, DM<br>Rohit Tandon, MD                                                                                                              | Suman Singh, PG                                                                 |           |                                                                               |
| Sarju Ralhan, M.Ch<br>(CTVS)<br>Naved Aslam, DM                                                                                                            | Baljeet Kaur, MSc<br>(Biotechnology)<br>Sonika Gupta , MBA,<br>B. Pharmacy      | Ludhiana  | Hero DMC Heart<br>Institute, Dayanand<br>Medical College and<br>Hospital (83) |
| Abhishek Goyal,<br>DM<br>Balram Bhargava,<br>DM<br>G.Karthikeyan, DM<br>S.Ramakrishnan,<br>DM<br>Sandeep Seth, DM<br>Rakesh Yadav, DM<br>Sandeep Singh, DM | Chandini Suvarna,<br>BDS                                                        | New Delhi | All India Institute Of<br>Medical Sciences<br>(67)                            |
| Ambuj Roy, DM<br>Neeraj Parakh, DM<br>Sunil Kumar Verma,<br>DM<br>Rajiv Narang, DM<br>Sundeep Mishra,<br>DM<br>Nitish Naik, DM<br>Gautam Sharma,<br>DM     |                                                                                 |           |                                                                               |

|                                                                                                                                        |                                                                                                                                                                                        |                      |                                                                                             |
|----------------------------------------------------------------------------------------------------------------------------------------|----------------------------------------------------------------------------------------------------------------------------------------------------------------------------------------|----------------------|---------------------------------------------------------------------------------------------|
| Shiv Kumar<br>Choudhary, M.Ch<br>Chetan Patel, DNB<br>Gurpreet Gulati, MD<br>Sanjeev Sharma,<br>MD<br>V K Bahl, DM<br>Anoop Mathew, MD | Binoy<br>Mannekkattukudy<br>Kurian                                                                                                                                                     | Kolenchery           | MOSC Medical<br>College Hospital (39)                                                       |
| Eapen Punnoose,<br>MD<br>Milind Avdhoot<br>Gadkari, MD<br>Siddharth Gadage,<br>MD DNB<br>Tapan Umesh<br>Pillay, BHMS MSc               | Sheetal Rupesh<br>Karwa, BHMS<br>Suvarna Kolhe, MSc                                                                                                                                    | Pune                 | KEM Hospital Pune<br>(35)                                                                   |
| Santhosh Satheesh,<br>MBBS, MD, DM                                                                                                     | R. J. Vindhya, B.Sc.<br>(Bio-Technology),<br>MSc(Bio-Informatics)                                                                                                                      | Pondicherry          | Jawaharlal Institute of<br>Postgraduate Medical<br>Education &<br>Research (JIPMER)<br>(31) |
| Atul Mathur, MD<br>Upendra Kaul, MD                                                                                                    | Peeyush Jain, MD<br>Ashok Seth, MD<br>Zile Singh Meharwal,<br>MD<br>Atul Verma, MD<br>Mona Bhatia, MD<br>Ankush Sachdeva,<br>MD<br>Thounaojam Indira<br>Devi, RN<br>Nungshi Jungla, RN | New Delhi            | Fortis Escort Heart<br>Institute<br>(31)                                                    |
| Johann Christopher,<br>MD, DNB<br>Rajeev Menon, MD,<br>DNB<br>Nirmal Kumar, MD,<br>DNB<br>Abraham Oomman,<br>MD,DM,DNB                 | K. Manjula Rani, MSc.<br>M. Sowjanya Reddy,<br>BSc<br>K. Preethi, BSc<br>Rinu R sidh,<br>MSc(Clinical<br>Research)                                                                     | Hyderabad            | Gurunanak CARE<br>Hospital (27)                                                             |
| Robert Mao, MD,<br>DM<br>Hilda Solomon, PhD<br>Sudhir Naik, MD,<br>DM<br>Sajeeda Parveen<br>Khan, MBBS,<br>(Dip.Card)                  | Ramakrishnan T.,<br>B.Tech(Biotechnology<br>)<br>Rajesh Francis,<br>MSc(Clinical<br>Research)<br>Vamshi Priya P., MSc                                                                  | Chennai<br>Hyderabad | Apollo Research and<br>Innovation (23)<br>Apollo Research &<br>Innovations (13)             |

|                                                                                                                                                                          |                                                                                        |            |                                                                       |
|--------------------------------------------------------------------------------------------------------------------------------------------------------------------------|----------------------------------------------------------------------------------------|------------|-----------------------------------------------------------------------|
| Johann Christopher, MD<br>Nirmal Kumar, MD                                                                                                                               | Kotiboinna Preethi                                                                     | Hyderabad  | CARE Nampally (11)                                                    |
| Purvez Grant, MD                                                                                                                                                         | Shweta Hande, BHMS, PGDCR<br>Poonam Sonawane, B.ScMicrobiology, ACCR<br>Abhishek Dubey | Pune       | Ruby Hall Clinic, Grant Medical Foundation (10)                       |
| Ranjan Kachru, MD                                                                                                                                                        | Kavita Rawat                                                                           | New Delhi  | Fortis Healthcare Fl.t Lt. Rajan Dhall Hospital (4)                   |
| Ajit Kumar VK, MD, DM<br>Sanjay Ganapathi, MD, DM<br>Jayakumar K, MS, M.Ch<br>Harikrishnan Sivadasanpillai, MD, DM<br>Bijulal Sasidharan, MD, DM<br>Kapilamoorthy TR, MD | Vineeth CP<br>Manas Chacko, RN<br>Suresh Babu                                          | Trivandrum | Sree Chitra Tirunal Institute for Medical Sciences and Technology (3) |
| Johann Christopher, MD<br>Praneeth Polamuri, MD                                                                                                                          | Sowjanya Reddy<br>Manjula Rani                                                         | Hyderabad  | CARE Hospital (3)                                                     |
| Upendra Kaul, MD                                                                                                                                                         | Priyadarshani Arambam<br>Bebek Singh                                                   | New Delhi  | Batra Hospital and Medical Research Centre (BHMRC) (3)                |

United Kingdom (539)

Country Leaders

Roxy Senior, MBBS, MD, DM

Keith AA Fox, MBChB  
(past)

Country Coordinators

Grace M. Young , MSc, BSc (Hons)

Kathryn Carruthers  
(past)

Roxy Senior, MBBS, MD, DM  
Ahmed Elghamaz, MB BCh  
Sothinathan Gurunathan, MBChB  
Nikolaos Karogiannis, MBBS  
Benoy N Shah, MD, MBBS, BSc (Hons)  
Richard HJ Trimlett, MBBS, CCST

Grace M. Young , MSc, BSc (Hons)  
Christopher Kinsey  
Raisa Kavalakkat, MSc, BSc, RN

Harrow

Northwick Park Hospital Harrow/  
Royal Brompton Hospital London (202)

|                                                                                                                                                                                                                                               |                                                                                                                                                     |                                                           |                                                                                                                                                  |
|-----------------------------------------------------------------------------------------------------------------------------------------------------------------------------------------------------------------------------------------------|-----------------------------------------------------------------------------------------------------------------------------------------------------|-----------------------------------------------------------|--------------------------------------------------------------------------------------------------------------------------------------------------|
| Michael B Rubens,<br>LRCP, MRCS,<br>MBBS, DMRD<br>Edward D Nicol,<br>MD, BMedSci,<br>MBBS, DTM&H<br>Tarun K Mittal, MD<br>Reinette Hampson,<br>BSc (Hons), BA<br>(Hons)                                                                       | Jo Evans, RN<br><br>Ikraam Hassan, RN                                                                                                               |                                                           |                                                                                                                                                  |
| Reto Andreas<br>Gamma, MBBS                                                                                                                                                                                                                   | Sarah Williams, RN<br>Kim Holland, RN<br>Karen Swan, RN                                                                                             | Chelmsford                                                | Broomfield Hospital<br>(39)                                                                                                                      |
| Mark A de Belder,<br>MD<br>Jeet Thambyrajah,<br>MD<br>Thuraia Nageh,<br>BSc(Hons) MBBS<br>MD MRCP<br>John R Davies,<br>MBBS, PhD<br>Steven J. Lindsay,<br>MD<br>John Kurian, MD<br>Haqeel Jamil, MD<br>Osama Raheem,<br>MD<br>Angela Hoye, MD | Bev Atkinson, RN<br><br>Swapna Kunhunny,<br>MRes Clin Res, BSc<br>(N), RN<br><br>Craig Atkinson, RN<br><br>Carita Krannila, RN<br>Manitha Vinod, RN | Middlesbrough<br><br>Westcliffe on<br>Sea<br><br>Bradford | The James Cook<br>University Hospital,<br>Middlesbrough (37)<br><br>Southend University<br>Hospital (34)<br><br>Bradford Royal<br>Infirmary (20) |
|                                                                                                                                                                                                                                               | Lisa Chaytor<br><br>Leanne Cox<br>Julie Morrow<br>Kay Rowe                                                                                          | Cottingham                                                | The University of<br>Hull/Castle Hill<br>Hospital (19)                                                                                           |
| Patrick Donnelly,<br>MD<br>Bernardas Valecka,<br>MD                                                                                                                                                                                           | Stephanie Kelly, RN<br>Susan Regan, RN                                                                                                              | Belfast                                                   | South Eastern Health<br>and Social Care (17)                                                                                                     |
| Anoop Chauhan,<br>MD                                                                                                                                                                                                                          | Dawn Turnbull<br>Catherine Fleming<br>Arijit Ghosh<br>Karen Gratrix<br>Stephen Preston                                                              | Blackpool                                                 | Blackpool Teaching<br>Hospitals (16)                                                                                                             |
| Craig Barr, MD                                                                                                                                                                                                                                | Anne Cartwright                                                                                                                                     | Dudley                                                    | Russells Hall Hospital<br>(15)                                                                                                                   |
| Khaled Alfakih,<br>MBBS, MD<br>Jonathan Byrne,<br>PhD<br>Ian Webb, PhD, MA                                                                                                                                                                    | Abigail Knighton,<br>BSc., PG Dip.<br>Katherine Martin,<br>RGN, Dip. N, MSc                                                                         | London                                                    | King's College NHS<br>Foundation Hospital<br>(14)                                                                                                |

|                                         |                                                                              |             |                                                                                           |
|-----------------------------------------|------------------------------------------------------------------------------|-------------|-------------------------------------------------------------------------------------------|
| Peter Henriksen, PhD, MB ChB, BSc(Hons) | Laura Flint, RGN                                                             | Edinburgh   | Royal Infirmary of Edinburgh (13)                                                         |
| Peter OKane, MD                         | James Harrison, BSc(Hons), PG dip<br>Nicki Lakeman<br>Anja Ljubez            | Bournemouth | Royal Bournemouth Hospital (13)                                                           |
| Ramesh de Silva, MB ChB, MD             |                                                                              | Bedford     | Bedford Hospital NHS Trust (11)                                                           |
| Dwayne S. G. Conway, MD                 | Judith Wright<br>Donna Exley                                                 | Wakefield   | Pinderfields Hospital (11)                                                                |
| Alexander A Sirker, MB BChir, PhD       | Mervyn Andiapen, RN<br>Amy J. Richards, BSc                                  | London      | University College London Hospitals NHS Foundation Trust<br>BartsHealth NHS Trust<br>(11) |
| Stephen P Hoole, MD                     | Lisa Wong, MSc                                                               | Cambridge   | Papworth Hospital (10)                                                                    |
| Fraser N. Witherow, MD                  | Melanie J. Munro, RGN                                                        | Dorchester  | Dorset County Hospital (8)                                                                |
| Nicola Johnston, MB, Bch BAO, MRCP, MD  | Michelle McEvoy, RN                                                          |             |                                                                                           |
| Mark Harbinson, MB, Bch BAO, MRCP, MD   |                                                                              | Belfast     | Belfast Trust (7)                                                                         |
| Simon Walsh, MB, Bch BAO, MD            | Caroline Brown, RN                                                           |             |                                                                                           |
| Hanna Douglas, MB, Bch BAO, MRCP, MD    |                                                                              |             |                                                                                           |
| Matthew Luckie, MD                      | Thabitha Charles<br>Laurel Kolakaluri<br>Hannah Phillips<br>Louise Morby, RN | Manchester  | Central Manchester University Hospital (7)                                                |
| Jolanta Sobolewska, MD                  | Karen Hallett, RN<br>Carolyn Corbett, RN<br>Lynne Winstanley                 | Oldham      | The Pennine Acute Hospitals NHS Trust (6)                                                 |
| Paramjit Jeetley, MD                    | Angelique Smit, RN                                                           | London      | Royal Free London NHS Foundation Trust (6)                                                |
| Niket Patel, MD                         |                                                                              |             |                                                                                           |
| Tushar Kotecha, MBChB, Mpharm           | Susan Gent, SRN<br>RGN                                                       | Luton       | Luton and Dunstable University Hospital NHS FT (5)                                        |
| Christopher Travill, MBBS, MD           | Nafisa Hussain, BSc                                                          |             |                                                                                           |
| Iqbal Karimullah, MBBS                  |                                                                              |             |                                                                                           |



|                                                                                                              |                                                                                                   |                    |                                                           |
|--------------------------------------------------------------------------------------------------------------|---------------------------------------------------------------------------------------------------|--------------------|-----------------------------------------------------------|
| Mahmud Al-Bustami, MBBS                                                                                      | Fiona Haines                                                                                      | Peterborough       | Peterborough City Hospital (5)                            |
| Denise Braganza, MD                                                                                          | Joanne Taaffe                                                                                     |                    |                                                           |
| Robert Henderson, MD                                                                                         | Jane Burton                                                                                       |                    |                                                           |
| Kate Pinton, MBBS                                                                                            | Maria Colton                                                                                      | Nottingham         | Nottingham University Hospitals (4)                       |
| Surendra Naik, PhD                                                                                           | Rachel King                                                                                       |                    |                                                           |
| Thomas Mathew, MBBS, MD, DM                                                                                  | Ammani Brown, MSc<br>BA RN<br>Andrew Docherty, RN                                                 |                    |                                                           |
| Colin Berry, BSc<br>MB ChB, PhD                                                                              | Lisa McCloy, RN                                                                                   |                    |                                                           |
| Damien Collison, MB ChB                                                                                      | Kate Robb, RN                                                                                     | Clydebank          | University of Glasgow (4)                                 |
| Giles Roditi, MB ChB                                                                                         | Craig Paterson, PhD<br>Wenda Crawford, RN<br>Joanne Kelly, RN<br>Lorraine McGregor, RN            |                    |                                                           |
| Andrew J Moriarty, BSc MB PhD                                                                                | Anne Mackin, RN, BSc                                                                              | Craigavon          | Cardiovascular Research Unit, Craigavon Area Hospital (2) |
| Jason D. Glover, MBBS                                                                                        | Janet P Knight, RN                                                                                | Basingstoke        | Hampshire Hospitals NHS Foundation Trust (2)              |
| Jiwan Pradhan, MBBS                                                                                          |                                                                                                   |                    |                                                           |
| Ghada Mikhail, MD                                                                                            | Tuhina Bose                                                                                       | London             | Imperial College Healthcare NHS Trust (1)                 |
| Darrel P. Francis, MD, MA                                                                                    |                                                                                                   |                    |                                                           |
| *Canada (447)<br>Country Leaders<br>Vladimir Dzavik, MD<br>Shaun G. Goodman, MD, MSc<br>Gilbert Gosselin, MD | Anna Proietti, RN<br>Myriam Brousseau, RN<br>Magalie Corfias, RN<br>Patricia Blaise<br>Luc Harvey | Montreal, QC       | Montreal Heart Institute (90)                             |
| Gilbert Gosselin, MD                                                                                         |                                                                                                   |                    |                                                           |
| Ariel Diaz, MD                                                                                               |                                                                                                   | Trois-Rivieres, QC | Centre Hospitalier de Regional Trois-Rivieres (71)        |
| Philippe Rheault, MD                                                                                         |                                                                                                   |                    |                                                           |

|                                             |                                     |                    |                                               |
|---------------------------------------------|-------------------------------------|--------------------|-----------------------------------------------|
| Miguel Barrero, MD                          |                                     |                    |                                               |
| Carl-Éric Gagné,<br>MD                      | Patricia Alarie                     |                    |                                               |
| Yanek Pépin-<br>Dubois, MD                  | Linda Arcand                        |                    |                                               |
| Ricardo Costa, MD                           | Isabelle Roy                        |                    |                                               |
| Ying Tung Sia, MD                           | Estelle Montpetit                   |                    |                                               |
| Catherine Lemay,<br>MD                      |                                     |                    |                                               |
| Alejandro Gisbert,<br>MD                    |                                     |                    |                                               |
| Pierre Gervais, MD                          |                                     |                    |                                               |
| Alain Rheault, MD                           |                                     |                    |                                               |
|                                             | Katia Drouin, RN                    |                    |                                               |
| Denis Carl Phaneuf,<br>MD                   | Christine Bergeron,<br>RN           | Terrebonne,<br>QC  | CISSSL - Hopital<br>Pierre-Le Gardeur<br>(42) |
| Gilbert Gosselin,<br>MD                     | Christine Shelley                   |                    |                                               |
|                                             | Christine Masson                    |                    |                                               |
| Pallav Garg, MBBS,<br>MSc                   | Sandy Carr, RN                      | London, ON         | London Health<br>Sciences Centre (35)         |
|                                             | Catherine Bone, RN                  |                    |                                               |
| Benjamin J.W.<br>Chow, MD                   | Ermina Moga                         |                    |                                               |
| Renee C. Hessian,<br>MD                     | Janetta Kourzenkova                 | Ottawa, ON         | University of Ottawa<br>Heart Institute (29)  |
| Rob S. Beanlands,<br>MD                     | Olga Walter                         |                    |                                               |
| Richard F. Davies,<br>MD                    |                                     |                    |                                               |
| Kevin R. Bainey,<br>MD, MSc                 | Norma Hogg, RN<br>Suzanne Welsh, RN | Edmonton, AB       | University of Alberta<br>(28)                 |
| Asim N. Cheema,<br>MD, PhD                  |                                     |                    |                                               |
| Akshay Bagai, MD,<br>MHS                    |                                     |                    |                                               |
| Ron Wald, MDCM,<br>MPH                      |                                     |                    |                                               |
| Shaun G. Goodman,<br>MD, MSc                | Khrystyna Kushniriuk,<br>HBSc, MD   | Toronto, ON        | St. Michael's Hospital<br>(27)                |
| John Joseph<br>Graham, MRCP,<br>MB ChB, BSc | Mohammed Hussain                    |                    |                                               |
| Mark Peterson, MD,<br>FRCSC, PhD            | Olugbenga Bello                     |                    |                                               |
| Chi-Ming Chow,<br>MD, CM, MSc               |                                     |                    |                                               |
| Beth Abramson,<br>MD, MSc                   |                                     |                    |                                               |
| Asim Nazir<br>Cheema, MD                    | Ishba Syed, MBBS                    | Mississauga,<br>ON | Dixie Medical Group<br>(24)                   |
| Mohammad Tariq<br>Vakani, MD                | Mohammed Hussain,<br>BSc(H)         |                    |                                               |

|                                                                                       |                                                                                          |                    |                                                                              |
|---------------------------------------------------------------------------------------|------------------------------------------------------------------------------------------|--------------------|------------------------------------------------------------------------------|
| James Cha, MD                                                                         | Khrystyna Kushniriuk, MBBS<br>Judy Otis, CRC<br>Rebecca Otis, CRC<br>Michelle M Seib, RN | Oshawa, ON         | Dr. James Cha (21)                                                           |
| Andrew G Howarth, MD, PhD                                                             | Sandra M Rivest, RN<br>Rosa Sandonato, BSCN                                              | Calgary, AB        | University of Calgary (15)                                                   |
| Graham Wong, MD                                                                       | Jackie Chow<br>Andrew Starovoytov<br>Naomi Uchida<br>Ngaire Meadows                      | Vancouver, BC      | Vancouver General Hospital (15)                                              |
| Amar Uxa, MD                                                                          | Nadia Asif<br>Suzana Tavares                                                             | Toronto, ON        | University Health Network (14)                                               |
| Paul Galiwango, MD<br>Saleem Kassam, MD<br>Ashok Mukherjee, MD<br>A. Joseph Ricci, MD | Bev Bozek, RN, CCRC<br>Maria Shier<br>Lori-Ann Larmand<br>Amir Janmohamed<br>Brenda Hart | Scarborough, ON    | Scarborough Cardiology Research (9)                                          |
| Andy Lam, MD                                                                          | Jane Marucci<br>Sharon Tai<br>Sonya Brons, RN<br>Chris Beck, RN                          | East Grimsby, ON   | West Lincoln Memorial Hospital (8)                                           |
| Shamir Mehta, MD                                                                      | Glenda Wong, RN<br>Krystal Etherington<br>Thippeekaa<br>Arumairajah<br>Maria Aprile      | Hamilton, ON       | Hamilton General Hospital (7)                                                |
| Jacob Udell, MD                                                                       | Sara Karlsson<br>Susan Webber                                                            | Toronto, ON        | Women's College Hospital (7)                                                 |
| Philippe Généreux, MD                                                                 | Chantale Mercure                                                                         | Montréal, QC       | Centre Intégré Universitaire de Santé et de Services Sociaux du Montréal (2) |
| Adnan Hameed, MD                                                                      | Nancy Aedy<br>Fran Farquharson                                                           | St. Catharines, ON | Saint Catharines General Hospital (2)                                        |
| Ledjalem Daba, MD                                                                     | Anam Siddiqui                                                                            | Vaughan, ON        | Northwest GTA Cardiovascular and Heart Rhythm Program (1)                    |

Brazil (399)

Country Leaders

Antonio Carlos Carvalho, MD, PhD

Renato D. Lopes, MD,  
PhD

|                                                                                                                                                                                                                                                                                                                                                                                         |                                                                                                                                                                                                               |                                                                                             |                                                                                                                                                                                                                                                              |
|-----------------------------------------------------------------------------------------------------------------------------------------------------------------------------------------------------------------------------------------------------------------------------------------------------------------------------------------------------------------------------------------|---------------------------------------------------------------------------------------------------------------------------------------------------------------------------------------------------------------|---------------------------------------------------------------------------------------------|--------------------------------------------------------------------------------------------------------------------------------------------------------------------------------------------------------------------------------------------------------------|
| Whady A. Hueb, MD<br>Paulo Cury Rezende, MD<br>Expedito Eustáquio Ribeiro Silva, MD<br>Alexandre Ciappina Hueb, MD<br>Paola Emanuela Poggio Smanio, MD, PhD<br>Alexandre Schaan de Quadros, MD<br>Renato Abdala Karam Kalil, MD<br>José Luiz da Costa Vieira, MD<br>Gabriel Grossmann, MD<br>Pedro Píccaro de Oliveira, MD<br>Leonardo Bridi, MD                                        | Myrthes Emy Takiuti, RN<br><br>Leonardo Pizzol Caetano, PhD<br><br>Aline Peixoto Deiro<br><br>Alice Manica Muller<br><br>Maria Antonieta Pereira de Moraes<br>Bruna Maria Ascoli<br><br>Sílvia Zottis Poletti | Sao Paulo<br><br>São Paulo<br><br><br><br>Porto Alegre                                      | Heart Institute (InCor) University of São Paulo (127)<br><br>Instituto Dante Pazzanese de Cardiologia (98)<br><br><br><br>Instituto de Cardiologia de Porto Alegre (41)                                                                                      |
| Simone Savaris, MD<br>João V Vitola, MD, PhD<br>Rodrigo J Cerci, MD, Msc<br>Fabio R Farias, MD, Msc<br>Miguel M Fernandes, MD, PhD<br>José Antonio Marin-Neto, MD, PhD<br>André Schmidt, MD, PhD<br>Moysés de Oliveira Lima Filho, MD, PhD<br>Ricardo Mendes Oliveira, MD<br>João Reynaldo Abbud Chierice, MD<br>Carísi A. Polanczyk, MD<br>Mariana V. Furtado, MD<br>Luis F. Smidt, MD | Sandra S. Zier, BSc<br><br>Vilmar Veiga Jr, BSc<br><br><br><br><br>Diego Franca da Cunha<br><br>Guilherme G Rucatti, PsyD<br>Fernanda Igansi, BSc<br><br>Mauren P Haeffner, BSc<br>Viviane Almeida            | Curitiba<br><br><br><br><br><br>Ribeirao Preto<br><br><br><br>Porto Alegre<br><br>Sao Paulo | Quanta Diagnostico & Terapia (33)<br><br><br><br><br><br>Hospital das Clinicas da Faculdade de Medicina de Ribeirão Preto da Universidade de São Paulo (31)<br><br><br><br>Hospital de Clínicas de Porto Alegre (12)<br><br>Unifesp - Hospital Sao Paulo (9) |

|                                               |                                                               |                 |                                                                                 |
|-----------------------------------------------|---------------------------------------------------------------|-----------------|---------------------------------------------------------------------------------|
| Gustavo Pucci, MD                             | Gabriela Sanchez de Souza                                     |                 |                                                                                 |
| Flavio Lyra, MD                               |                                                               |                 |                                                                                 |
| Alvaro Rabelo Alves Junior, MD                | Mayana Almeida<br>Viviane dos Santos                          | Salvador        | Fundacao Bahiana de Cardiologia (9)                                             |
| Marianna D. A. Dracoulakis, MD, PhD           | Natalia S Oliveira, RN                                        | Salvador        | Hospital da Bahia (8)                                                           |
| Rodolfo G. S. D Lima, MD                      |                                                               |                 |                                                                                 |
| Estevao Figueiredo, MD                        | Bruna Edilena Paulino Azevedo<br>Marco Bizzaro Santos         | Belo Horizonte  | Hospital Lifecenter (8)                                                         |
|                                               |                                                               |                 |                                                                                 |
| Paulo Ricardo Caramori, MD                    | Amanda Germann<br>Vitor Gomes<br>Rosa Homem<br>Ellen Magedanz | Porto Alegre    | Hospital Sao Lucas da Pontificia Universidade Catolica do Rio Grande do Sol (7) |
|                                               |                                                               |                 |                                                                                 |
| Rogério Tumelero, MD                          | Rosane Laimer<br>Alexandre Tognon                             | Fundo           | Hospital Sao Vicente de Paulo (5)                                               |
| Frederico Dall'Orto, MD                       |                                                               | Pocos de Caldas | Hospital Maternidade e Pronto Socorro Santa Lucia (4)                           |
|                                               |                                                               |                 |                                                                                 |
| Claudio T. Mesquita, MD                       |                                                               |                 |                                                                                 |
| Alexandre S. Colafranceschi, MD               |                                                               |                 |                                                                                 |
|                                               |                                                               |                 |                                                                                 |
| Amarino C. Oliveira Jr., MD                   | Roberta P Santos, RN                                          | Botafogo        | Hospital Pró-Cardíaco (3)                                                       |
| Luiz A. Carvalho, MD                          |                                                               |                 |                                                                                 |
| Isabella C. Palazzo, MD                       |                                                               |                 |                                                                                 |
| Andre S. Sousa, MD                            |                                                               |                 |                                                                                 |
| Expedito Eustáquio Ribeiro da Silva, MD, PhD  |                                                               |                 |                                                                                 |
| Pedro Gabriel Melo de Barros e Silva, MD, PhD | Mariana Yumi Okada, RN                                        |                 |                                                                                 |
| Luciana de Pádua Silva Baptista, MD, PhD      | Ana Paula Batista, RN                                         | Sao Paulo       | Hospital TotalCor (2)                                                           |
| Marcelo Jamus Rodrigues, MD                   | Aline Nogueira Rabaça, BS                                     |                 |                                                                                 |
| Marcos Valério Coimbra de Resende, MD, PhD    |                                                               |                 |                                                                                 |
| Jose Francisco Saraiva, MD                    | Larissa Miranda Trama                                         | Sao Paulo       | Hospital Celso Pierro (1)                                                       |

|                                                                                                                                       |                                                                                                                                                                                                                |                                                                                                   |          |                                                                                  |
|---------------------------------------------------------------------------------------------------------------------------------------|----------------------------------------------------------------------------------------------------------------------------------------------------------------------------------------------------------------|---------------------------------------------------------------------------------------------------|----------|----------------------------------------------------------------------------------|
|                                                                                                                                       |                                                                                                                                                                                                                | Talita Silva<br>Camila Thais de Souza Ormundo<br>Carla Vicente<br>Caroline Pinheiro               |          | Hospital Cardiologico Costantini (1)                                             |
|                                                                                                                                       | Costantino Costantini, MD, PhD                                                                                                                                                                                 | Daniele Komar                                                                                     | Curitiba |                                                                                  |
| Poland (333)<br>Country Leaders<br>Witold Ruzyllo, MD, PhD<br>Hanna Szwed, MD, PhD<br>Country Coordinator<br>Radoslaw Pracon, MD, PhD | Marcin Demkow, MD, PhD<br>Radoslaw Pracon, MD, PhD<br>Cezary Kepka, MD PhD<br>Anna Teresinska, MD PhD<br>Karolina Kryczka, MD PhD<br>Jan Henzel, MD PhD<br>Mateusz Solecki, MD PhD<br>Edyta Kaczmarska, MD PhD | Olga Walesiak<br>Katarzyna Malinowska                                                             | Warsaw   | Coronary and Structural Heart Diseases Department, Institute of Cardiology (127) |
|                                                                                                                                       | Tomasz Mazurek, MD, PhD                                                                                                                                                                                        | Jakub Maksym, MD<br>Karolina Wojtera, MD<br>Anna Fojt, MD<br>Ewa Szczerba, MD<br>Szymon Jonik, MD | Warszawa | Medical University of Warsaw (48)                                                |
|                                                                                                                                       | Jaroslaw Drozd, PhD<br>Bartosz Czarniak, MD<br>Malgorzata Frach (formerly Stasiak), MD<br>Konrad Szymczyk, MD<br>Iwona Niedzwiecka, MD<br>Sebastian Sobczak, MD<br>Tomasz Ciurus, MD                           |                                                                                                   | Lodz     | Cardiology Clinic, Medical University in Lodz (43)                               |

|                                      |                                                  |          |                                                                                                                                     |
|--------------------------------------|--------------------------------------------------|----------|-------------------------------------------------------------------------------------------------------------------------------------|
| Piotr Jakubowski,<br>MD              |                                                  |          |                                                                                                                                     |
| Magdalena Misztal-<br>Teodorczyk, MD |                                                  |          |                                                                                                                                     |
| Dawid Teodorczyk,<br>MD              | Marta Swiderek, MA                               |          |                                                                                                                                     |
| Aleksandra<br>Fratczak, MD           | Ewelina Wojtala, MA                              |          |                                                                                                                                     |
| Marcin Szkopiak,<br>MD               |                                                  |          |                                                                                                                                     |
| Patrycja Lebioda,<br>MD              |                                                  |          |                                                                                                                                     |
| Michal Wlodarczyk,<br>MD             |                                                  |          |                                                                                                                                     |
| Anna Plachcinska,<br>MD              |                                                  |          |                                                                                                                                     |
| Jacek Kusmierek,<br>MD               |                                                  |          |                                                                                                                                     |
| Magdalena Miller,<br>MD              |                                                  |          |                                                                                                                                     |
| Halina Marciniak,<br>MD              |                                                  |          |                                                                                                                                     |
| Karolina Wojtczak-<br>Soska, MD      |                                                  |          |                                                                                                                                     |
| Katarzyna Łuczak,<br>MD              |                                                  |          |                                                                                                                                     |
| Tomasz Tarchalski,<br>MD             |                                                  |          |                                                                                                                                     |
| Anna Cichocka-<br>Radwan, MD         |                                                  |          |                                                                                                                                     |
| Hanna Szwed, MD,<br>PhD              | Jaroslaw Karwowski,<br>MD                        | Warsaw   | National Institute of<br>Cardiology, Warsaw<br>(35)                                                                                 |
| Grazyna Anna<br>Szulczyk, MD         |                                                  |          |                                                                                                                                     |
| Adam Witkowski,<br>MD, PhD           |                                                  |          |                                                                                                                                     |
| Krzysztof Kukuła,<br>MD, PhD         |                                                  | Warsaw   | Department of<br>Interventional<br>Cardiology &<br>Angiology, Institute of<br>Cardiology (20)                                       |
| Małgorzata Celińska-<br>Spodar, MD   |                                                  |          |                                                                                                                                     |
| Joanna Zalewska,<br>MD               |                                                  |          |                                                                                                                                     |
| Grzegorz Gajos,<br>MD, PhD           |                                                  |          |                                                                                                                                     |
| Krzysztof Bury, MD,<br>PhD           |                                                  | Krakow   | Department of<br>Coronary Disease,<br>John Paul II Hospital,<br>Jagiellonian<br>University Medical<br>College (16)                  |
| Piotr Pruszczyk,<br>MD, PhD          | Andrzej Łabyk, MD                                |          | Department of<br>Internal Medicine and<br>Cardiology, Infant<br>Jesus Teaching<br>Hospital, Medical<br>University of Warsaw<br>(15) |
| Marek Roik, MD,<br>PhD               | Agnieszka<br>Szramowska, MD<br>Olga Zdończyk, MD | Warszawa |                                                                                                                                     |







|                                                                                                                                                                                                                                                                                                                                                                                   |                                                                                                                  |                            |                                                                                                                                          |
|-----------------------------------------------------------------------------------------------------------------------------------------------------------------------------------------------------------------------------------------------------------------------------------------------------------------------------------------------------------------------------------|------------------------------------------------------------------------------------------------------------------|----------------------------|------------------------------------------------------------------------------------------------------------------------------------------|
| Carlos Peña Gil,<br>MD, PhD<br>Amparo Martinez<br>Monzonis, MD<br>Alessandro Sionis,<br>MD<br>Montserrat Vila<br>Perales, MD<br>Josep Maria Padró,<br>MD<br>Antonio Serra<br>Peñaranda, MD<br>Joan García Picart,<br>MD<br>Antonino Ginel<br>Iglesias, MD<br>Xavier Garcia-Moll<br>Marimon, MD<br>Guillem Pons Lladó,<br>MD<br>Francesc Carreras<br>Costa, MD<br>Vicente Miro, MD | Ana Fernández<br>Martínez, RN                                                                                    | Barcelona                  | Hospital de la Santa<br>Creu i Sant Pau (11)                                                                                             |
| Jose L Diez, MD<br>Pilar Calvillo, MD<br>F. Marin Ortuño,<br>MD, PhD<br>M. Valdés Chávarri,<br>MD, PhD<br>A. Tello Montolliu,<br>MD, PhD<br>E. Pinar Bermudez,<br>MD, PhD<br>G. De La Morena,<br>MD, PhD                                                                                                                                                                          | Begoña Igual, MD<br><br><br>M. Quintana Giner,<br>MD<br>A.I. Romero Anierte,<br>MD<br>JM. Rivera Caravaca,<br>MD | Valencia<br><br><br>Murcia | Hospital Universitario<br>y Politecnico La Fe<br>(10)<br><br><br>HUVA, Hospital<br>Clínico Universitario<br>Virgen De La<br>Arrixaca (8) |
| Montserrat Gracida<br>Blancas, MD                                                                                                                                                                                                                                                                                                                                                 | Olga Cañavate<br>Sonia Guerrero<br>Silvia Riera                                                                  | Barcelona                  | Hospital De Bellvitge<br>(4)                                                                                                             |
| Jose Enrique<br>Castillo Luena, MD                                                                                                                                                                                                                                                                                                                                                | Jose Enrique Castillo<br>Luena<br>Maria Lasala                                                                   | Zaragoza                   | Hospital Universitario<br>Miguel Servet (4)                                                                                              |
| Francisco<br>Fernandez-Aviles,<br>MD                                                                                                                                                                                                                                                                                                                                              | Maria Lorenzo<br>Olga Sobrino<br>Alexandra Vazquez                                                               | Madrid                     | Hospital General<br>Universitario Gregorio<br>Maranon (2)                                                                                |
| China (246)<br>Country Leader<br>Lixin Jiang, MD, PhD                                                                                                                                                                                                                                                                                                                             | Haojian Dong<br>Peiyu He<br>Chunli Xia                                                                           | Guangzhou                  | Guangdong General<br>Hospital (102)                                                                                                      |

|                                  |                                                                                                               |           |                                                                        |
|----------------------------------|---------------------------------------------------------------------------------------------------------------|-----------|------------------------------------------------------------------------|
|                                  | Junqing Yang<br>Qi Zhong                                                                                      |           |                                                                        |
| Yongjian Wu, MD,<br>PhD          | Yanmeng Tian, MD<br>Dongze Li                                                                                 | Beijing   | Chinese Academy of<br>Medical Sciences,<br>Fuwai Hospital (17)         |
| Yitong Ma, MD<br>Yining Yang, MD | Xiaomei Li<br>Xiang Ma<br>Zixiang Yu<br>Qian Zhao<br>Chunguang Li                                             | Urumqi    | First Affiliated<br>Hospital of Xinjiang<br>Medical University<br>(15) |
| Zheng Ji, MD                     | Lei Zhang<br>Yu Zhao<br>Bolin Zhu<br>Mulei Chen                                                               | Tangshan  | Tangshan Gongren<br>Hospital (15)                                      |
| Xinchun Yang, MD                 | Hongjie Chi<br>Yang Wang<br>Jing Zhang<br>Rui Jing                                                            | Beijing   | Beijing Chao-yang<br>Hospital, Capital<br>Medical University<br>(12)   |
| Wenhua Lin, MD                   | Jingjing Liu<br>Qiang Zhou, MD<br>Chang Xu, MD                                                                | Tianjing  | TEDA International<br>Cardiovascular<br>Hospital (12)                  |
| Hesong Zeng, MD                  | Zhuxi Li, MD<br>Junhua Li, MD<br>Luyang Xiong, MD<br>Dan Gao                                                  | Wuhan     | Tongji Medical<br>College (11)                                         |
| Xin Fu, MD                       | Dengke Jiang<br>Ran Leng<br>Xutong Wang<br>Qianqian Yuan<br>Lili Zhang<br>Ziliang Bai<br>Jianhua Li<br>Jie Qi | Zhengzhou | The First Affiliated<br>Hospital of<br>Zhengzhou University<br>(11)    |
| Bin Yang, MD                     | Fei Wang<br>Haitao Wang<br>Bin Yang<br>Zhou Yue<br>Zhulin Zhang<br>Yumei Dong                                 | Taiyuan   | Shanxi<br>Cardiovascular<br>Hospital (10)                              |
| Songtao Wang, MD                 | Jiajia Mao<br>Bin Zhang                                                                                       | Qingdao   | Qingdao Fuwai<br>Hospital (8)                                          |

|                                             |                                                                                  |           |                                                                                                       |
|---------------------------------------------|----------------------------------------------------------------------------------|-----------|-------------------------------------------------------------------------------------------------------|
| Gong Cheng, MD                              | Xiuhong Li<br>Xiaowei Yao<br>Nier Zhong<br>Ning Zhou<br>Yaping Huang, MS         | Xian      | Shanxi Provincial<br>People's Hospital (6)                                                            |
| Yulan Zhao, MD                              | Panpan Zhou, MS                                                                  | Zhengzhou | The Second Affiliated<br>Hospital of<br>Zhengzhou University<br>(6)                                   |
| Xuehua Fang, MD                             | Wei Su                                                                           | Beijing   | Liangxiang Hospital,<br>Beijing Fangshan<br>District (6)                                              |
| Qiutang Zeng, MD                            | Yu Kunwu<br>Yudong Peng<br>Xin Su                                                | Wuhan     | Wuhan Union<br>Hospital, Tongji<br>Medical College,<br>Huazhong Science<br>and Tech University<br>(3) |
| Xi Su, MD                                   | Chen Wang<br>Yunhai Zhao                                                         | Wuhan     | Wuhan Asia Heart<br>Hospital (3)                                                                      |
| Qingxian Li, MD                             | Yaming Geng<br>Yanfu Wang                                                        | Jining    | Affiliated Hospital of<br>Jining Medical<br>University (3)                                            |
| Shao-ping Nie, MD,<br>PhD                   | Jing-yao Fan, MD<br>Si-ting Feng, MD,PhD<br>Xiao Wang, MD,PhD<br>Yan Yan, MD,PhD | Beijing   | Beijing Anzhen<br>Hospital (2)                                                                        |
| Qin Yu, MD                                  | Hui-min Zhang,<br>MD,PhD<br>Lingping Chi<br>Fang Liu                             | Dalian    | Affiliated Zhongshan<br>Hospital of Dalian<br>University (2)                                          |
| Jian'an Wang, MD                            | Han Chen<br>Jun Jiang<br>Huajun Li<br>Jian'an Wang                               | Hangzhou  | The Second Affiliated<br>Hospital Zhejiang<br>University School of<br>Medicine (1)                    |
| Shuyang Zhang,<br>MD, PhD<br>Zhenyu Liu, MD | Yechen Han, MM<br>Lihong Xu, RN<br>Zhenyu Liu<br>Gang Chen<br>Rongrong Hu        | Beijing   | Peking Union Medical<br>College Hospital (1)                                                          |
| Gian Piero Perna,<br>MD<br>Marco Marini, MD | Francesca Pietrucci,<br>PhD                                                      | Ancona    | Cardiology and CCU<br>- Ospedali Riuniti<br>Ancona (54)                                               |

\*Italy (139)  
Country Leader  
Aldo P. Maggioni, MD

|                                                                         |                                                                   |                      |                                                                                                               |
|-------------------------------------------------------------------------|-------------------------------------------------------------------|----------------------|---------------------------------------------------------------------------------------------------------------|
| Gabriele Gabrielli, MD<br>Stefano Provasoli, MD<br>Edoardo Verna, MD    | Anna Di Donato                                                    | Varese               | Ospedale di Circolo e Fondazione Macchi (23)                                                                  |
| Lorenzo Monti, MD<br>Barbara Nardi, MD                                  |                                                                   | Rozzano              | Humanitas Research Hospital, Rozzano (MI) (17)                                                                |
| Antonio Di Chiara, MD                                                   | Francesca Pezzetta, MD                                            | Tolmezzo             | Azienda Servizi Sanitaria n.3 Alto Friuli-Collinare-Medio Friuli (9)                                          |
| Andrea Mortara, MD<br>Marcello Galvani, MD<br>Filippo Ottani, MD        | Valentina Casali, MD<br>Chiara Attanasio                          | Monza<br>Forli       | Policlinico di Monza, Monza MB (8)<br>Ospedale "G.B. Morgagni – L. Pierantoni" Forli (AUSL della Romagna) (8) |
| Marco Sicuro, MD                                                        | Gianpiero Leone, MD<br>Francesco Pisano, MD<br>Cristina Bare, BSc | Aosta                | Ospedale Regionale Umberto Parini (5)                                                                         |
| Paolo Calabro, MD<br>Tiziana Formisano, MD                              | Fabio Fimiani                                                     | Napoli               | AORN Dei Colli "V. Monaldi" UOC Cardiologia Università della Campania "L.Vanvitelli" (4)                      |
| Giuseppe Tarantini, MD<br>Umberto Cucchini, MD<br>Anto Luigi Andres, MD | Alberto Barioli, MD<br>Federica Ramani                            | Padua                | University of Padua-Cardiology Clinic (3)                                                                     |
| Emanuela Racca, MD                                                      | Fabrizio Rolfo, MD<br>Cecilia Goletto                             | Cuneo                | Azienda Ospedaliera S. Croce e Carle (3)                                                                      |
| Carlo Briguori, MD                                                      | Francesca De Micco                                                | Naples               | Clinica Mediterranea (2)                                                                                      |
| Roberto Amati, MD                                                       | Stefano Di Marco, MD                                              |                      | UO Cardiologia                                                                                                |
| William Vergoni, MD<br>Aldo Russo, MD                                   | Martina Tricoli                                                   | Pescia               | Ospedale SS Cosma e Damiano (2)                                                                               |
| Raffaele Fanelli, MD                                                    | Massimo Vilella, MD                                               | San Giovanni Rotondo | IRCCS "Casa Sollievo della Sofferenza" (1)                                                                    |

\*Singapore (61)

Country Leader

Harvey D. White, DSc

Country Coordinator

Caroline Alsweiler

Kian-Keong Poh,  
MD  
Ping Chai, MD

Joshua P. Loh, MD

Edgar L. Tay, MD

Kristine Teoh, MD

Lynette L. Teo, MD

Ching-Ching Ong,  
MD

Raymond C. Wong,  
MD

Poay-Huan Loh,  
MD

Theodoros Kofidis,  
MD

David Foo, MBBS

Jason Loh Kwok  
Kong, MD

Ching Min Er, MD

Fahim Haider  
Jafary, MD

Terrance Chua, MD

Sik-Yin V Tan, BSc

Winnie C Sia, BSc

Audrey W Leong, BSc

Li Hai Yan, RN

Nasrul Ismail

Min Tun Kyaw

Deborah Yip

Singapore

Singapore

Singapore

National University  
Heart Center  
Singapore (33)

Tan Tock Seng  
Hospital (22)

National Heart Centre  
Singapore (6)

Germany (54)

Country Leader

Rolf Doerr, MD

Rolf Doerr, MD

Juergen Stumpf,  
MD

Klaus Matschke,  
MD, PhD

Gregor Simonis,  
MD, PhD

Clemens T. Kadalie,  
MD

Udo Sechtem, MD

Peter Ong, MD

P. Christian  
Schulze, MD, PhD

Dorit Grahl

Franziska Guenther

Kerstin Bonin

Ina Wenzelburger

Susanne  
Gruensfelder, RN

Dresden

Stuttgart

Jena

Praxisklinik Herz und  
Gefaesse (29)

Robert-Bosch-  
Krankenhaus (22)

University Hospital  
Jena (2)

|                             |                                           |                                                                    |          |                                                            |
|-----------------------------|-------------------------------------------|--------------------------------------------------------------------|----------|------------------------------------------------------------|
|                             | Bjoern Goebel, MD                         |                                                                    |          |                                                            |
|                             | Karsten Lenk, MD                          |                                                                    |          |                                                            |
|                             | Georg Nickenig, MD                        | Jan-Malte Sinning, MD<br>Marcel Weber, MD<br>Nikos Werner, MD      | Bonn     | Universitätsklinikum Bonn (1)                              |
| Austria (50)                |                                           |                                                                    |          |                                                            |
| Country Leaders             |                                           |                                                                    |          |                                                            |
| Irene Marthe Lang, MD       |                                           |                                                                    |          |                                                            |
| Kurt Huber, MD              |                                           |                                                                    |          |                                                            |
|                             | Herwig Schuchlenz, MD<br>Stefan Weikl, MD | Gudrun Steinmaurer                                                 | Graz     | LKH Graz West Austria (35)                                 |
|                             | Irene Marthe Lang, MD                     | Max-Paul Winter, MD                                                | Vienna   | Medical University of Vienna, Department of Cardiology (8) |
|                             |                                           | Tijana, Andric, MD                                                 |          |                                                            |
|                             | Kurt Huber, MD                            | Maximilian, Tscharré, MD                                           |          |                                                            |
|                             | Gabriele, Jakl-Kotauschek, MD             | Claudia, Wegmayr, MSc<br>Bernhard, Jäger, MD<br>Florian, Egger, MD | Vienna   | Wilhelminen Hospital Vienna (7)                            |
| Hungary (49)                |                                           |                                                                    |          |                                                            |
| Country Leader              |                                           |                                                                    |          |                                                            |
| Matyas Keltai, MD, PhD, DSc |                                           |                                                                    |          |                                                            |
|                             |                                           | Judit Sebo, MD                                                     |          |                                                            |
|                             | Andras Vertes, MD                         | Zoltan Davidovits, MD<br>Laszlong Matics                           | Budapest | Eszszk- Szent Istvan Hospital (20)                         |
|                             | Albert Varga, MD, PhD<br>Geza Fontos, MD  | Gergely Ágoston, MD                                                | Szeged   | University of Szeged (12)                                  |
|                             |                                           | Gabor Dekany, MD                                                   | Budapest | George Gottsegen National Institute of Cardiology (9)      |
|                             | Bela Merkely, MD, PhD, DSc                | Andrea Bartykowszki, MD<br>Pal Maurovich-Horvat, MD, PhD, MPH      | Budapest | Heart and Vascular Center, Semmelweis University (8)       |
|                             | Gabor Kerecsen, MD                        | Agnes Jakal                                                        | Budapest | Military Hospital, Budapest (1)                            |
| Serbia (47)                 |                                           |                                                                    |          |                                                            |
|                             | Sasa Hinic, MD, BSc                       | Jelena Djokic, MD                                                  | Belgrade |                                                            |

|             |                                                                                                                                                                                                                                                            |                                                                                                          |                     |                                                                                                                                                                         |
|-------------|------------------------------------------------------------------------------------------------------------------------------------------------------------------------------------------------------------------------------------------------------------|----------------------------------------------------------------------------------------------------------|---------------------|-------------------------------------------------------------------------------------------------------------------------------------------------------------------------|
|             | Marija Zdravkovic,<br>MD, PhD<br>Vladan Mudrenovic,<br>MD<br>Bogdan Crnokrak,<br>MD<br>Branko D. Beleslin,<br>MD, PhD<br>Nikola N. Boskovic,<br>MD<br>Marija T. Petrovic,<br>MD<br>Milan R. Dobric, MD                                                     | Ana D. Djordjevic-<br>Dikic, MD, PhD<br>Vojislav L. Giga, MD,<br>PhD<br>Jelena J. Stepanovic,<br>MD, PhD | Belgrade            | University Hospital<br>Center Bezanijska<br>Kosa (13)<br><br>Faculty of Medicine,<br>University of<br>Belgrade; Cardiology<br>Clinic, Clinical Center<br>of Serbia (10) |
|             | Zeljko Z. Markovic,<br>MD, PhD<br>Ana S. Mladenovic,<br>MD, PhD                                                                                                                                                                                            | Lazar Velicki, MD                                                                                        |                     | Institute of<br>Cardiovascular<br>Diseases Vojvodina,<br>Sremska Kamenica,<br>Serbia and Faculty of<br>Medicine, University<br>of Novi Sad (9)                          |
|             | Nada Cemerlic-<br>Adjic, MD                                                                                                                                                                                                                                | Ljiljana Pupic                                                                                           | Sremska<br>Kamenica |                                                                                                                                                                         |
|             | Goran Davidović,<br>MD, PhD<br>Rada Vučić, MD                                                                                                                                                                                                              | Stefan M. Simović,<br>MD                                                                                 | Kragujevac          | Clinical Center<br>Kragujevac (7)                                                                                                                                       |
|             | Milica Nikola<br>Dekleva, MD PhD                                                                                                                                                                                                                           | Miroslav Stevo<br>Martinovic, MD<br>Gordana Stevanovic                                                   | Belgrade            | University Clinical<br>Hospital Zvezdara (6)                                                                                                                            |
|             | Goran Stankovic,<br>MD                                                                                                                                                                                                                                     | Milan Dobric                                                                                             | Belgrade            | Clinical Center of<br>Serbia (1)                                                                                                                                        |
|             | Svetlana<br>Apostolovic, MD                                                                                                                                                                                                                                | Sonja Salinger<br>Martinovic<br>Dragana Stanojevic                                                       | Nis                 | Clinic for<br>Cardiovascular<br>Diseases, Clinical<br>Center Nis (1)                                                                                                    |
| Mexico (46) | Jorge Escobedo,<br>MD<br>Rubén Baleón-<br>Espinosa, MD<br>Arturo S Campos-<br>Santaolalla, MD<br>Elihú Durán-Cortés,<br>MD<br>José M Flores-<br>Palacios, MD<br>Andrés García-<br>Rincón, MD<br>Moisés Jiménez-<br>Santos, MD<br>Joaquín V Peñafiel,<br>MD | Ramon de Jesús-<br>Pérez, RN                                                                             | Benito Juarez       | Instituto Mexicano del<br>Seguro Social (35)                                                                                                                            |



José A Ortega-Ramírez, MD  
Aquiles Valdespino-Estrada, MD

María Fernanda Canales Brassetti, MD  
Diego Adrián Vences Anaya, MD  
María Pérez García

Erick Alexánderson Rosas, MD

Isabel Estela Carvajal Juárez, MD  
Magdalena Madero Rovalo, MC  
Erick Donato Morales Rodríguez, MD

Mexico City

Instituto Nacional de Cardiología "Ignacio Chávez" (11)

Australia (45)

Country Leaders

Joseph B. Selvanayagam, MBBS (Hons), DPhil

Jamie Rankin, MBBS (*past*)

Country Coordinator

Deirdre Murphy

Joseph B. Selvanayagam, MBBS (Hons), DPhil  
Majo X. Joseph, MBBS

Sau Lee, PhD

Adelaide

Flinders Medical Centre (30)

Prince Thomas, RN

Melissa D Chaplin, RN

Suku T. Thambar, MBBS

Stephanie C Boer, B Biotechnology (Honours)  
Jeanette K. Stansborough, RN

New Lambton Heights

John Hunter Hospital (8)

John F. Beltrame, MD

Marilyn Black, RN

Woodville South

The Queen Elizabeth Hospital (5)

Graham S. Hillis, PhD

Michelle M. Bonner, B. Nursing  
Kim F. Ireland, RN  
Clare Venn-Edmonds, RN

Perth

Royal Perth Hospital (2)

France (42)

Country Leader

Philippe-Gabriel Steg, MD

Country Coordinators

Helene Abergel

Jean-Michel Juliard

|                   |                             |                                   |                        |                                                     |
|-------------------|-----------------------------|-----------------------------------|------------------------|-----------------------------------------------------|
|                   |                             | Corine Thobois, RN                |                        |                                                     |
|                   | Christophe Thuaire, MD      | Emilie Tachot, RN                 |                        |                                                     |
|                   | Téodora Dutoiu, MD          | Christophe Laure, RN              | Chartres               | C.H. Louis Pasteur (21)                             |
|                   |                             | Christel Vassaliere, RN           |                        |                                                     |
|                   | Philippe Gabriel Steg, MD   | Helene Abergel, MSc               |                        |                                                     |
|                   | Jean-Michel Juliard, MD     | Axelle Fuentes, MSc               | Paris                  | Bichat Hospital (9)                                 |
|                   | Michel S. Slama, MD         | Ludivine Eliahou, MD              | Clamart Cedex          | Antoine-Beclere Hospital (5)                        |
|                   | Rami El Mahmoud, MD         | Olivier Dubourg, MD               |                        |                                                     |
|                   |                             | Pierre Michaud, MD                | Boulogne               | Ambroise Pare Hospital (2)                          |
|                   | Eric Nicolle, MD            | Sarah Hadjih                      | Corbeil-Essonnes Cedex | Centre Hospitalier Sud Francilien (2)               |
|                   | Pascal Goube, MD            | Patricia Brito                    |                        |                                                     |
|                   | Gilles Barone-Rochette, MD  | Gilles Barone-Rochette            | Grenoble               | Grenoble University Hospital (2)                    |
|                   | Alain Furber, MD            | Charles Cornet, MD, PhD           |                        |                                                     |
|                   | Loïc Bière, MD              | Jeremy Rautureau, MD, PhD         | Angers Cedex 9         | Centre Hospitalier Universitaire d'Angers (1)       |
| Lithuania (39)    |                             | Agne Juceviciene, MD              |                        |                                                     |
|                   |                             | Irma Kalibataite-Rutkauskiene, MD |                        |                                                     |
|                   |                             | Laura Keinaite                    |                        |                                                     |
|                   | Aleksandras Laucevicius, MD | Monika Laukyte                    |                        |                                                     |
|                   | Jelena Celutkiene, MD       | Gelmina Mikolaitiene              | Vilnius                | Vilnius University Hospital Santariskes Clinic (39) |
|                   |                             | Akvile Smigelskaite, MD           |                        |                                                     |
|                   |                             | Ilona Tamasauskiene, MD           |                        |                                                     |
|                   |                             | Agne Urboniene, MD                |                        |                                                     |
| *Netherlands (37) |                             |                                   |                        |                                                     |
|                   | Elvin Kedhi MD, PhD         |                                   |                        |                                                     |
|                   | Jorik Timmer, MD            | Ilse Bouwhuis                     |                        |                                                     |
|                   | Rik Hermanides, MD          | Lia Nijmeijer                     | Zwolle                 | Isala Klinieken (25)                                |
|                   | Eliza Kaplan, MD            |                                   |                        |                                                     |
|                   | Robert K. Riezebos, MD, PhD |                                   |                        |                                                     |
|                   | Pouneh Samadi, MD           | Jeannette, J. M. Schoep, RN       | Amsterdam              | Cardio Research Hartcentrum OLVG (11)               |



|                                 |                                       |                        |                                 |                                                         |
|---------------------------------|---------------------------------------|------------------------|---------------------------------|---------------------------------------------------------|
| Argentina (29)                  | Ricardo L. Lopes, MD                  |                        | Vila Nova de Gaia               | Centro Hospitalar de Vila Nova de Gaia/Espinho, EPE (2) |
| Country Leader                  |                                       |                        |                                 |                                                         |
| Rafael Diaz, MD ( <i>past</i> ) |                                       |                        |                                 |                                                         |
|                                 | Luis Guzman, MD                       | Veronica Tinnirello    | Cordoba                         | Instituto Medico DAMIC (11)                             |
|                                 | Julio César Figal, MD                 |                        |                                 |                                                         |
|                                 | Oscar Méndiz, MD                      |                        |                                 |                                                         |
|                                 | Claudia Cortés, MD                    | Matías Nicolás Mungo   | Ciudad Autonoma de Buenos Aires | Fundación Favaloro (10)                                 |
|                                 | Roberto René Favaloro, MD             |                        |                                 |                                                         |
|                                 | Carlos Alvarez, MD                    | Marina Garcia          | Bahia Blanca                    | Hospital Italiano Regional del Sur Bahia Blanca (3)     |
|                                 | Javier Courtis, MD                    |                        |                                 |                                                         |
|                                 | Gabriela Zeballos, MD                 | Valeria Godoy          | Cordoba                         | Clinica Romagosa and Clinica De La Familia (2)          |
|                                 | Lilia Schiavi, MD                     | Maria Victoria Actis   | Cordoba                         | Clinica Del Prado (2)                                   |
|                                 | Mariano Rubio, MD                     | Graciela Scaro, MD     | Cordoba                         | Clínica Privada Vélez Sarsfield (1)                     |
| *New Zealand (28)               |                                       |                        |                                 |                                                         |
| Country Leader                  |                                       |                        |                                 |                                                         |
| Harvey D. White, DSc            |                                       |                        |                                 |                                                         |
| Country Coordinator             |                                       |                        |                                 |                                                         |
| Caroline Alswailer              |                                       |                        |                                 |                                                         |
|                                 | Gerard Patrick Devlin, MD             | Liz Low, RN            |                                 |                                                         |
|                                 | Raewyn Fisher, MD                     | Jayne Scales, RN       | Hamilton                        | Waikato Hospital (22)                                   |
|                                 |                                       | Kirsty Abercrombie, RN |                                 |                                                         |
|                                 | Ralph Alan Huston Stewart, MB,ChB, MD |                        |                                 |                                                         |
|                                 | Harvey D. White, DSc                  | Leah Howell , RN       |                                 |                                                         |
|                                 | Jocelyne Benatar, MD                  | Cathrine Patten, RN    | Auckland                        | Auckland City Hospital (6)                              |
| *Macedonia (28)                 |                                       |                        |                                 |                                                         |
|                                 | Sasko Kedev, MD, PhD                  |                        | Skopje                          | University Clinic of Cardiology (28)                    |
|                                 | Irena Peovska Mitevaska, MD, PhD      |                        |                                 |                                                         |

|                                |                                          |                            |             |                                                      |
|--------------------------------|------------------------------------------|----------------------------|-------------|------------------------------------------------------|
|                                | Elizabetha Srbinovska Kostovska, MD, PhD |                            |             |                                                      |
|                                | Hristo Pejkov, MD,<br>PhD                |                            |             |                                                      |
| *Sweden (23)                   |                                          |                            |             |                                                      |
| Country Leader                 |                                          |                            |             |                                                      |
| Claes Held, MD, PhD            |                                          |                            |             |                                                      |
|                                | Claes Held, MD,<br>PhD                   |                            |             |                                                      |
|                                | Kai Eggers, MD,<br>PHhD                  |                            |             |                                                      |
|                                | Gunnar Frostfelt,<br>MD, PhD             | Christina Björklund,<br>RN |             |                                                      |
|                                | Nina Johnston, MD,<br>PhD                | Maria Andreasson,<br>RN    | Uppsala     | Uppsala University<br>(18)                           |
|                                | Maciej Olsowka,<br>MD                    | Marie Essermark, RN        |             |                                                      |
|                                | Axel Åkerblom, MD,<br>PhD                |                            |             |                                                      |
|                                | Inga Soveri, MD,<br>PhD                  |                            |             |                                                      |
|                                | Johannes Aspberg,<br>MD                  | Liselotte Persson          | Stockholm   | Karolinska Institutet<br>at Danderyd Hospital<br>(5) |
| Israel (15)                    |                                          |                            |             |                                                      |
| Country Leaders                |                                          |                            |             |                                                      |
| Rafael Beyar, MD, MD, DSc, MPH |                                          |                            |             |                                                      |
| Tali Sharir, MD                |                                          |                            |             |                                                      |
| Country Coordinator            |                                          |                            |             |                                                      |
| Eugenia Nikolsky, MD           |                                          |                            |             |                                                      |
|                                | Tali Sharir, MD                          |                            |             |                                                      |
|                                | Dan Elian, MD                            | Or Harel, MA               | Tel-Aviv    | Assuta Medical<br>Centers (9)                        |
|                                | Arthur Kerner, MD                        | Margalit Bentzvi           |             |                                                      |
|                                | Samia Massalha,<br>MD                    | Ludmila Helmer             | Haifa       | Rambam Medical<br>Center (6)                         |
| Japan (14)                     |                                          |                            |             |                                                      |
| Country Leader                 |                                          |                            |             |                                                      |
| Shun Kohsaka, MD               |                                          |                            |             |                                                      |
|                                | Keiichi Fukuda, MD,<br>PhD               | Ikuko Ueda, PhD            |             |                                                      |
|                                | Shun Kohsaka, MD                         | Jun Fujita, MD             | Shinjuku-ku | Keio University (7)                                  |
|                                | Satoshi Yasuda,<br>MD, PhD               | Akemi Furukawa, RN         |             |                                                      |
|                                |                                          | Kanae Hirase, RN           | Suita-shi   | National Cerebral and<br>Cardiovascular              |

|                            |                                                                                                  |                                                                               |             |                                                        |
|----------------------------|--------------------------------------------------------------------------------------------------|-------------------------------------------------------------------------------|-------------|--------------------------------------------------------|
|                            |                                                                                                  | Toshiyuki Nagai, MD,<br>PhD<br>Fumiyuki Otsuka, MD,<br>PhD<br>Shintaro Nakano | Hidaka      | Center<br>(4)<br><br>Saitama Medical<br>University (3) |
| *Belgium (7)               | Shigeyuki<br>Nishimura, MD                                                                       |                                                                               |             |                                                        |
| Country Leader             |                                                                                                  |                                                                               |             |                                                        |
| Frans Van de Werf, MD, PhD |                                                                                                  |                                                                               |             |                                                        |
| Country Coordinator        |                                                                                                  |                                                                               |             |                                                        |
| Kaatje Goetschalckx, MD    |                                                                                                  |                                                                               |             |                                                        |
|                            | Kaatje<br>Goetschalckx, MD<br>Frans Van de Werf,<br>PhD, MD<br>Kathleen Claes,<br>PhD, MD        | Valerie Robesyn                                                               | Leuven      | University Hospital<br>Leuven (7)                      |
| *Taiwan (7)                |                                                                                                  |                                                                               |             |                                                        |
| Country Leader             |                                                                                                  |                                                                               |             |                                                        |
| Harvey D. White, DSc       |                                                                                                  |                                                                               |             |                                                        |
| Country Coordinator        |                                                                                                  |                                                                               |             |                                                        |
| Caroline Alswailer         |                                                                                                  |                                                                               |             |                                                        |
|                            | Chung-Lieh Hung,<br>MD<br>Chun-Ho Yun, MD                                                        |                                                                               |             |                                                        |
|                            | Charles Jia-Yin<br>Hou, MD<br>Jen-Yuan Kuo, MD                                                   |                                                                               |             |                                                        |
|                            | Hung-I Yeh, MD,<br>PhD<br>Ta-Chuan Hung,<br>MD<br>Jiun-Yi Li, MD, PhD                            |                                                                               |             |                                                        |
|                            | Chen-Yen Chien,<br>MD, PhD<br>Cheng-Ting Tsai,<br>MD<br>Chun-Chieh Liu,<br>MD<br>Fa-Chang Yu, MD | Yi-Hsuan Yang                                                                 | Taipei City | Mackay Memorial<br>Hospital (7)                        |
|                            | Yueh-Hung Lin, MD                                                                                |                                                                               |             |                                                        |
|                            | Wei-Ren Lan, MD                                                                                  |                                                                               |             |                                                        |
|                            | Chih-Hsuan Yen,<br>MD                                                                            |                                                                               |             |                                                        |

|                   |                                                                                                                                                            |                                                                   |                        |                                                                                                                         |
|-------------------|------------------------------------------------------------------------------------------------------------------------------------------------------------|-------------------------------------------------------------------|------------------------|-------------------------------------------------------------------------------------------------------------------------|
|                   | Jui-Peng Tsai, MD<br>Kuo-Tzu Sung, MD                                                                                                                      |                                                                   |                        |                                                                                                                         |
| *South Africa (7) | Mpiko Ntsekhe, MD<br>Shaheen Pandie, MD<br>Charle A Viljoen, MD<br>Marianne De Andrade, MD                                                                 | Constance Philander (Nee Talliard), ND<br>Noloyiso Mtana, RN      | Cape Town              | Groote Schuur Hospital / University of Cape Town (7)                                                                    |
| *Switzerland (7)  |                                                                                                                                                            |                                                                   |                        |                                                                                                                         |
| Country Leader    | Aldo P. Maggioni, MD                                                                                                                                       |                                                                   |                        |                                                                                                                         |
|                   | Tiziano Moccetti, MD<br>M.Grazia Rossi, MD                                                                                                                 | Adriana Anesini, RN<br>Simona Maspoli, RN<br>Manuela Mombelli, RN | Lugano                 | Cardiocentro (7)                                                                                                        |
| Egypt (6)         | Magdy Abdelhamid, MD<br>Ahmed Adel, MD<br>Ahmed Kamal, MSc<br>Hossam Mahrous, MD<br>Sameh El Kaffas, MD<br>Hussien El Fishawy, MD                          | Ahmed Talaat, MD                                                  | Cairo                  | Cairo University (6)                                                                                                    |
| Romania (5)       | Calin Pop, MD, PhD<br>Matei Claudia, MD, PhD<br>Bogdan A. Popescu, MD, PhD<br>Carmen Ginghina, MD, PhD<br>Dan Deleanu, MD, PhD<br>Vlad A. Iliescu, MD, PhD | Monica Rosca, MD, PhD<br>Carmen C. Beladan, MD, PhD               | Bucharest<br>Bucharest | Emergency County Hospital Baia Mare (4)<br>Emergency Institute of Cardiovascular Diseases "Prof. Dr. C. C. Iliescu" (1) |
| *Saudi Arabia (5) | Mouaz H. Al-Mallah, MD MSc<br>Ahmed Aljeeri, MD                                                                                                            | Sarah Zahrani, RN                                                 | Central Province       | King AbdulAziz Cardiac Center (5)                                                                                       |

|                      |                                                                                                                                                                                                                                                                                                       |                                                                         |              |                                                    |
|----------------------|-------------------------------------------------------------------------------------------------------------------------------------------------------------------------------------------------------------------------------------------------------------------------------------------------------|-------------------------------------------------------------------------|--------------|----------------------------------------------------|
|                      | Hani Najm, MD<br>Ali Alghamdi, MD                                                                                                                                                                                                                                                                     |                                                                         |              |                                                    |
| *Peru (4)            | Walter Enrique Mogrovejo Ramos, MD                                                                                                                                                                                                                                                                    | Marco Antonio Monsalve Davila, RN                                       | Mirafloes    | Instituto Neuro Cardiovascular De Las Americas (4) |
| Thailand (3)         |                                                                                                                                                                                                                                                                                                       |                                                                         |              |                                                    |
| Country Leader       |                                                                                                                                                                                                                                                                                                       |                                                                         |              |                                                    |
| Harvey D. White, DSc |                                                                                                                                                                                                                                                                                                       |                                                                         |              |                                                    |
| Country Coordinator  |                                                                                                                                                                                                                                                                                                       |                                                                         |              |                                                    |
| Caroline Alswailer   |                                                                                                                                                                                                                                                                                                       |                                                                         |              |                                                    |
|                      | Srun Kuanprasert, MD<br>Arintaya Prommintikul, MD<br>Weerachai Nawarawong, MD<br>Surin Woragidpoonpol, MD<br>Thitipong Tepsuwan, MD<br>Noppon Taksaudom, MD<br>Chataroon Rimsukcharoenchai, MD<br>Juntima Euathrongchit, MD<br>Yutthaphan Wannasopha, MD<br>Sukit Yamwong, MD<br>Piyamitr Sritara, MD | Supatchara Khwakhong, RN<br>Anong Chaayasri, RN                         |              |                                                    |
|                      |                                                                                                                                                                                                                                                                                                       | Warangkana Mekara, RN<br>Supap Kulthawong, RN<br>Anong Amaritakomol, RN | Chiang Mai   | Maharaj Nakorn Chiang Mai Hospital (2)             |
|                      | Suthara Aramcharoen, MD<br>Krissada Meemuk, MD                                                                                                                                                                                                                                                        | Pachara Panpunuan, RN                                                   | Bangkok      | Ramathibodi Hospital (1)                           |
| *Malaysia (2)        |                                                                                                                                                                                                                                                                                                       |                                                                         |              |                                                    |
| Country Leader       |                                                                                                                                                                                                                                                                                                       |                                                                         |              |                                                    |
| Harvey D. White, DSc |                                                                                                                                                                                                                                                                                                       |                                                                         |              |                                                    |
| Country Coordinator  |                                                                                                                                                                                                                                                                                                       |                                                                         |              |                                                    |
| Caroline Alswailer   |                                                                                                                                                                                                                                                                                                       |                                                                         |              |                                                    |
|                      | Ahmad Khairuddin, MD                                                                                                                                                                                                                                                                                  | Noor Syamira Mokhtar, RN                                                | Kuala Lumpur | Institut Jantung Negara (2)                        |



Hafidz Abd Hadi,  
MD  
Shaiful Azmi  
Yahaya, MD

Nor Asiah Basri, RN  
Irni Yusnida, RN  
Humayrah Hashim

*\* Countries participated in Economics Quality of Life (EQoL) Questionnaires*

*\*\*This site received one participant in transfer that was randomized at another site*
